# Supplementary material for: Gene Expression Dynamics Accompanying the Sponge Thermal Stress Response
Source: PLoS One. 2016 Oct 27;11(10):e0165368. doi: 10.1371/journal.pone.0165368 (PMC5082814; doi:10.1371/journal.pone.0165368)
Supplement: S2 File — Transcript abundance estimation was performed by mapping paired-end reads back to the H. tubifera non-redundant reference transcriptome assembly using RSEM. (XLSX) [file pone.0165368.s002.xlsx]

## Sheet: S2
	29C replicate 1	29C replicate 2	34C, 4hrs replicate 1	34C, 4hrs replicate 2	34C, 12hrs replicate 1	34C, 12hrs replicate 2	32C, 12hrs replicate 1	32C, 12hrs replicate 2
c51581_g1_i1	235	358	210	280	313	279	139	123
c50227_g4_i2	465	589	1046	898	1705	1421	609	620
c50918_g6_i1	168	236	1072	834	928	894	843	564
c50436_g2_i1	722	1215	1397	1724	1251	951	996	999
c54579_g1_i2	579	806	801	849	1011	908	653	716
c48999_g1_i2	413	631	523	571	786	823	371	383
c53954_g1_i5	1637	2872	2903	3360	4664	4441	2395	2419
c56123_g1_i8	230	348	333	399	243	212	163	160
c43287_g1_i4	246	389	287	366	261	293	143	135
c56144_g1_i8	190	221	63	56	130	115	35	45
c36272_g1_i2	62	128	100	127	132	84	53	67
c55017_g1_i1	242	337	320	406	304	256	165	163
c54711_g2_i3	73	108	113	141	170	94	53	70
c55483_g2_i4	100	183	153	271	181	192	100	85
c24932_g1_i1	88	137	245	215	270	228	85	87
c50320_g1_i1	515	732	648	790	875	709	411	394
c47969_g1_i1	176	229	252	357	118	76	66	90
c38259_g1_i2	90	152	82	121	102	76	58	46
c53767_g1_i1	3251	4981	4810	5864	5062	4587	2653	2588
c50430_g2_i1	112	178	220	287	168	180	145	146
c50390_g1_i1	514	822	721	817	945	761	388	385
c52175_g1_i1	501	766	770	947	650	517	307	327
c45138_g1_i3	289	441	378	529	578	480	227	283
c54687_g1_i1	978	1462	1535	2033	1394	1337	1131	1078
c41653_g1_i4	1511	2106	1555	1854	2085	1687	1027	1069
c48506_g3_i3	239	327	218	224	187	179	141	157
c53693_g3_i8	93	169	1559	1806	822	788	331	361
c60050_g1_i1	442	752	576	745	472	397	285	331
c40085_g1_i1	179	230	183	217	138	120	91	90
c49593_g1_i1	227	387	241	277	425	301	151	177
c43042_g1_i1	224	312	228	265	450	453	184	234
c54948_g1_i10	1811	2758	2661	3419	1912	1902	1882	1597
c46349_g2_i1	239	424	356	426	243	221	174	199
c40555_g1_i2	253	363	213	261	370	308	89	95
c43005_g1_i1	1097	1488	1	8	892	555	347	365
c42286_g1_i4	250	407	17	21	16	21	1	0
c48275_g1_i2	152	226	177	238	199	182	84	77
c45854_g3_i2	100	156	190	203	134	122	81	75
c38726_g1_i1	1027	2584	528	729	2270	1704	317	403
c52810_g1_i1	200	343	283	360	158	193	250	233
c43095_g1_i1	225	302	419	438	423	391	212	244
c54795_g1_i7	336	545	435	521	572	478	299	339
c55814_g1_i3	167	258	276	319	728	561	176	200
c51091_g1_i2	106	135	69	115	53	63	36	26
c53843_g1_i1	113	141	174	225	119	108	85	61
c44108_g1_i7	237	389	246	237	180	230	141	162
c57688_g1_i1	128	192	167	202	228	167	105	129
c49094_g1_i1	1444	2062	1860	2187	2508	1980	1142	1110
c20411_g1_i1	195	315	257	309	262	206	110	106
c43258_g1_i3	928	1505	1216	1414	1340	1080	611	664
c54876_g1_i1	117	170	137	252	61	85	19	40
c39748_g1_i1	277	448	419	506	388	364	224	236
c56324_g1_i1	153	290	184	230	168	160	109	90
c54541_g1_i9	316	494	483	604	576	464	274	306
c53454_g1_i1	264	397	391	490	314	371	233	175
c28178_g1_i1	72	145	108	117	75	66	48	75
c51672_g2_i3	752	1167	722	970	1346	898	690	730
c26061_g1_i1	597	874	677	853	677	461	347	418
c54373_g3_i2	47	62	37	45	36	22	84	109
c48048_g1_i1	2288	3793	2441	2871	2664	2390	1543	1560
c53097_g3_i3	4338	6412	9424	11487	7165	6564	6213	5952
c38939_g1_i1	369	703	419	415	1169	798	461	621
c43268_g1_i1	116	193	214	278	228	178	127	111
c45079_g2_i2	809	1260	1128	1424	1244	933	566	583
c42924_g1_i1	1503	2262	4203	3893	4120	3687	3713	3075
c50460_g2_i1	146	236	142	172	242	193	91	112
c52387_g1_i1	282	352	340	414	256	262	170	169
c53817_g1_i1	150	210	263	301	157	115	78	82
c40068_g1_i1	843	952	199	136	183	121	442	187
c20012_g1_i1	0	0	126	133	1	5	97	90
c48242_g1_i2	473	710	682	836	547	506	358	340
c47902_g1_i2	133	247	161	262	67	63	41	37
c46684_g1_i1	143	215	234	279	220	177	106	119
c50575_g1_i2	77	165	238	254	166	181	182	146
c52282_g3_i1	3517	5285	4878	4922	8570	6710	3988	3403
c48021_g1_i2	123	149	20	9	0	0	2	1
c30837_g1_i1	183	342	240	412	633	496	140	136
c56475_g1_i5	887	1272	1076	1199	1105	1038	691	733
c43888_g1_i1	86	134	90	93	83	83	46	39
c47268_g1_i4	607	813	775	816	1057	834	499	513
c22972_g1_i1	258	359	119	174	0	0	105	111
c46509_g1_i1	561	877	897	1022	1165	980	487	482
c53388_g3_i1	113	159	227	217	525	519	349	310
c46952_g1_i2	864	1432	1420	1556	1324	1215	786	810
c30689_g1_i1	1208	1566	1039	1393	166	109	365	210
c34320_g1_i1	399	669	611	828	803	610	432	432
c47968_g1_i2	132	216	86	134	242	184	127	115
c48239_g1_i3	120	153	0	0	41	24	18	18
c54324_g1_i1	153	287	214	275	721	613	618	497
c56517_g1_i4	848	1194	538	742	112	83	292	221
c46856_g1_i3	127	185	255	320	409	320	129	120
c46689_g1_i1	493	822	666	849	855	669	398	398
c43047_g1_i1	866	1101	1107	1600	698	565	406	308
c45015_g1_i1	536	788	613	689	532	451	285	335
c37182_g1_i1	1277	2052	1940	2405	1696	1419	1041	903
c53652_g1_i1	390	710	866	911	1110	1094	405	497
c47383_g1_i2	199	299	538	314	778	679	1374	1876
c55790_g1_i1	1300	2139	2048	2685	1950	2071	1316	1292
c45311_g1_i3	87	143	1	2	75	56	4	2
c43136_g1_i1	6459	10253	8418	10343	10348	7715	4963	4452
c47082_g1_i2	181	318	262	290	343	340	205	200
c44230_g1_i1	98	160	179	201	233	188	74	97
c54407_g1_i1	1075	1681	2020	2209	3698	3219	1749	1998
c45593_g1_i1	3169	5180	5584	6200	6321	4312	3179	3227
c38264_g1_i1	738	1009	1358	1413	1825	1597	1026	1057
c49269_g3_i4	94	180	95	170	45	38	108	121
c54126_g4_i1	78	150	105	133	58	42	68	58
c36827_g1_i1	1502	2022	3513	2497	4253	3063	2677	3645
c54708_g1_i3	435	625	187	246	385	405	287	271
c53982_g2_i3	322	478	464	512	163	160	169	177
c39992_g1_i1	580	918	886	1140	1284	1066	570	588
c47296_g1_i1	77	110	92	161	160	140	82	99
c41300_g1_i1	87	118	39	36	28	12	89	110
c30652_g1_i1	257	453	410	607	400	274	211	221
c42145_g1_i1	357	376	222	228	170	117	359	172
c54805_g1_i3	85	144	121	111	180	114	68	59
c38443_g1_i2	105	178	160	242	174	135	67	83
c48750_g1_i1	228	336	657	779	602	403	198	241
c49554_g3_i6	162	286	11	18	201	132	0	0
c45072_g1_i3	145	285	5	12	102	94	8	20
c36405_g1_i1	77	92	100	118	136	106	70	69
c52440_g1_i1	1222	1923	1712	2188	1864	1613	1214	1125
c45594_g1_i1	145	272	247	305	226	157	101	119
c16096_g1_i1	103	145	216	240	153	168	118	105
c8104_g1_i1	1122	1714	1452	1682	1357	1143	921	870
c39402_g1_i2	88	117	122	139	146	108	51	77
c55905_g3_i5	248	419	42	91	119	99	30	41
c46493_g3_i1	116	178	148	193	156	127	71	78
c54688_g2_i5	184	230	45	66	91	100	22	32
c33123_g1_i1	234	375	489	481	725	620	738	497
c46040_g2_i5	270	404	561	547	858	807	477	474
c36037_g1_i1	225	360	334	394	765	425	215	289
c56090_g1_i1	3194	5272	4440	5059	5876	5603	5284	5543
c50423_g1_i6	556	977	754	876	841	680	368	379
c44125_g2_i1	117	118	55	69	33	33	28	38
c45381_g1_i2	392	559	455	636	548	504	260	289
c48192_g1_i2	103	154	91	141	106	65	38	61
c52707_g2_i1	142	264	291	384	429	423	92	86
c50669_g4_i2	169	178	197	264	235	159	147	75
c43188_g1_i2	638	867	734	934	659	617	425	400
c48437_g1_i1	1340	2074	2125	2687	2517	2193	1352	1283
c56760_g1_i1	4304	6126	10419	12285	4521	5158	6676	5300
c53912_g1_i4	435	615	833	1001	464	473	270	246
c33050_g1_i1	69	118	119	153	177	100	43	47
c40729_g1_i1	388	510	530	508	582	528	348	348
c54124_g1_i2	742	898	34	43	52	73	1625	1378
c38829_g1_i2	91	159	178	193	191	162	92	93
c48728_g4_i1	37	58	57	50	0	0	90	113
c50156_g1_i1	600	914	828	1117	688	651	554	413
c48554_g7_i6	722	1003	659	796	580	553	312	370
c50467_g2_i3	420	758	712	1025	39	31	145	160
c44412_g1_i1	212	347	377	498	278	193	189	199
c45297_g2_i4	916	1253	2238	1693	3282	2460	2804	1694
c49673_g4_i6	0	0	428	612	1	0	0	0
c56646_g1_i3	98	144	218	251	93	88	176	156
c33955_g1_i1	107	116	46	71	61	44	29	43
c43548_g1_i1	222	382	319	371	419	354	195	204
c45399_g1_i1	195	313	256	311	397	305	173	170
c46761_g1_i1	84	148	120	184	136	102	54	36
c55013_g2_i2	604	979	1022	1058	1093	1006	877	761
c54743_g2_i1	608	960	781	942	815	833	626	573
c56313_g2_i4	196	396	102	87	365	321	304	252
c44141_g1_i1	4744	7719	7446	8950	8581	6219	3559	3568
c47126_g1_i1	175	246	229	288	230	244	136	125
c18480_g1_i1	178	182	151	229	125	129	116	74
c50791_g1_i2	53	84	164	176	74	86	85	84
c47765_g1_i1	181	265	265	332	226	261	152	150
c51471_g1_i7	144	223	273	339	199	189	113	121
c48159_g3_i1	0	0	204	242	0	0	0	0
c50223_g2_i1	100	175	17	21	37	36	23	27
c25042_g1_i1	7602	11256	9010	9838	15903	9998	6270	6096
c25136_g1_i1	50962	81371	56074	67766	80958	65376	23303	24336
c40192_g1_i1	554	1116	641	812	789	676	494	663
c48027_g1_i1	2059	2878	1904	2360	2016	1717	1016	947
c53858_g1_i12	98	152	166	210	204	226	139	140
c51449_g1_i3	130	183	203	219	245	160	89	89
c46193_g1_i1	790	1358	1139	1477	1518	1260	572	658
c54682_g1_i3	259	324	217	237	256	220	99	137
c55478_g1_i2	157	250	855	1137	8	17	174	198
c45583_g2_i1	153	247	137	203	148	170	122	132
c52142_g3_i1	404	633	656	809	630	525	316	292
c47451_g1_i1	329	538	738	926	281	141	80	88
c70976_g1_i1	6657	9225	10529	9665	20136	16551	11637	8644
c40230_g1_i3	374	1084	421	506	477	375	224	256
c43221_g1_i2	786	1223	686	751	844	750	765	542
c41937_g1_i1	108	220	26	34	104	45	156	73
c13315_g1_i1	523	740	921	1027	777	636	473	510
c48458_g1_i1	161	321	334	349	196	191	205	202
c54041_g1_i4	749	1243	1116	1554	987	970	700	645
c33418_g1_i2	598	772	1283	1283	595	565	557	461
c52724_g2_i1	604	904	454	653	1246	1168	646	775
c39642_g1_i1	241	277	13	22	14	21	11	11
c54647_g1_i3	191	298	232	372	354	303	149	122
c51685_g1_i3	197	306	249	313	273	199	107	115
c48466_g1_i1	376	536	349	442	626	490	274	289
c29280_g1_i1	24	60	133	141	71	74	48	50
c45762_g1_i4	615	1041	1113	1208	1387	1169	680	606
c49803_g1_i1	447	630	557	736	711	591	314	336
c49003_g2_i1	97	146	116	148	116	99	63	56
c42636_g1_i1	120	179	10	27	31	19	8	12
c37660_g1_i1	40	71	249	305	337	253	0	0
c42257_g2_i1	2059	2891	2485	2760	3111	2657	1913	1819
c11776_g1_i1	427	686	655	701	711	672	470	505
c54267_g1_i1	55	135	140	120	150	106	157	160
c48664_g1_i1	135	162	145	174	172	116	64	55
c51782_g1_i1	1569	2669	2083	2399	2385	2200	1478	1455
c49774_g1_i3	189	270	356	382	237	214	159	139
c31002_g1_i1	1461	2083	2001	2475	2095	1645	1152	1100
c47820_g1_i3	119	202	34	43	113	152	13	16
c55489_g1_i2	1538	2550	2403	2925	2842	2578	1851	1762
c42881_g1_i1	273	351	209	272	373	225	140	153
c53714_g1_i5	431	685	540	618	553	388	248	205
c51430_g1_i1	265	351	301	250	525	373	315	306
c68958_g1_i1	1	0	572	673	0	1	0	0
c41070_g1_i1	990	1695	1371	1717	1342	1366	967	794
c49260_g2_i1	201	348	163	207	180	174	156	160
c43672_g1_i2	1130	1721	1787	2077	2704	2241	1335	1320
c33097_g1_i2	74	96	142	223	124	109	39	28
c54652_g2_i1	73	120	106	133	159	143	71	58
c45044_g1_i3	293	474	365	425	442	263	191	227
c56627_g1_i2	307	477	321	372	282	278	153	178
c35584_g1_i2	198	295	284	322	291	173	133	139
c49597_g1_i1	1684	2488	2640	3124	3485	2722	1683	1665
c48660_g1_i2	169	235	243	301	190	136	91	93
c54368_g1_i1	4418	7387	5158	6373	4644	3810	3241	3104
c50917_g1_i7	672	1147	1221	1755	942	819	844	817
c56498_g1_i1	0	1	196	149	33	36	118	130
c46560_g1_i1	117	199	244	295	170	153	116	101
c52247_g1_i1	188	238	2	0	1	0	1	0
c55893_g1_i3	541	940	695	931	1124	952	459	469
c46063_g1_i1	2089	2994	2690	4059	168	101	2773	2469
c55917_g2_i2	221	346	372	463	58	67	181	179
c49608_g1_i1	1105	1317	1564	1379	2705	2280	1895	1546
c55463_g1_i1	368	555	482	643	565	461	268	237
c52348_g1_i9	222	378	451	518	410	305	191	188
c50037_g1_i1	2326	3562	4890	4827	7141	5408	2846	2342
c48148_g1_i2	204	290	247	329	154	126	189	160
c27747_g1_i1	2864	4739	4216	5419	3960	3080	2534	2362
c8126_g1_i1	0	0	71	70	0	0	103	114
c33734_g1_i2	248	392	10	14	14	9	2	0
c51341_g2_i3	542	802	746	767	1431	1293	597	550
c31749_g2_i1	3113	5070	4801	5693	6496	3958	2627	2643
c51443_g1_i1	88	150	132	146	182	172	88	99
c70940_g1_i1	132	274	53	76	33	24	34	47
c39077_g1_i6	540	823	668	812	1004	720	440	437
c56194_g6_i1	6	9	160	197	17	13	5	3
c32718_g1_i1	165	394	223	367	452	448	262	453
c56570_g1_i7	307	511	340	423	469	462	205	230
c302_g1_i1	261	424	488	559	581	380	272	278
c24908_g1_i1	1	1	128	85	138	135	55	58
c47350_g1_i1	81	153	113	124	118	66	41	47
c21494_g1_i1	39	39	109	162	79	109	38	23
c36925_g1_i1	143	237	255	355	287	217	99	101
c50545_g1_i1	365	543	445	586	342	330	229	225
c46815_g1_i4	71	98	160	211	234	153	77	74
c54921_g2_i4	544	844	211	271	188	154	129	104
c53982_g1_i1	384	664	645	788	278	291	229	247
c45134_g1_i1	822	1474	1551	2039	1648	1455	911	784
c47019_g1_i6	230	343	287	343	676	623	264	310
c53243_g1_i5	8179	13361	9165	7088	11002	9863	9271	8132
c55503_g1_i7	42	47	164	230	58	70	70	48
c39316_g1_i1	5174	7640	8083	8807	8138	5814	3653	3461
c45056_g1_i2	254	400	230	334	252	284	249	246
c38556_g1_i1	232	266	258	295	131	120	141	138
c22781_g1_i1	83	122	54	56	4	10	16	15
c52455_g2_i1	105	125	94	111	110	110	41	60
c54546_g2_i1	85	96	93	157	72	97	59	50
c35556_g1_i1	1329	1801	1016	1192	1591	1419	747	720
c6637_g1_i1	310	504	435	585	610	408	213	204
c49754_g2_i2	194	320	245	358	235	224	245	203
c47307_g1_i1	385	646	601	675	738	568	268	303
c45575_g1_i1	1180	1632	2349	1945	4832	3357	1681	1474
c45677_g1_i2	601	887	810	979	904	740	454	432
c52662_g1_i1	2228	3500	2620	3598	3351	3211	2027	2411
c56357_g1_i1	4188	5627	6399	7472	4798	4499	5931	5122
c48077_g1_i1	546	906	693	929	658	535	420	415
c41867_g1_i1	947	1594	1639	1834	1771	1472	1013	939
c54930_g1_i3	288	516	466	628	433	431	294	251
c55395_g2_i1	1548	2495	2127	2672	2623	2128	1635	1463
c56867_g1_i1	972	1791	132	165	243	283	65	102
c55432_g1_i1	8897	13990	11828	15128	8165	6610	5404	5522
c41499_g2_i1	136	286	366	515	197	132	99	135
c43933_g1_i1	119	152	96	159	206	128	52	67
c34495_g1_i2	301	394	311	309	310	236	162	150
c28527_g1_i1	263	320	529	584	627	455	272	270
c47607_g1_i1	403	619	424	527	589	464	292	263
c54348_g1_i1	133	175	348	414	639	588	315	252
c55308_g1_i2	1333	1859	1719	1981	2269	2013	1083	1008
c45958_g1_i4	675	1009	814	922	887	727	504	505
c44325_g1_i1	0	2	188	371	112	124	14	2
c50637_g1_i7	451	755	316	443	551	411	208	226
c44781_g2_i1	118	148	114	102	3	1	151	125
c56396_g2_i1	284	489	285	359	7	12	5	4
c42059_g1_i1	407	627	543	625	426	419	325	272
c52067_g1_i2	867	1346	1201	1764	1008	938	578	658
c49737_g1_i1	149	229	177	246	197	182	82	70
c50939_g1_i2	64	139	25	48	144	81	18	39
c49297_g1_i5	105	115	114	60	487	332	151	100
c42399_g1_i1	52	169	402	540	535	278	98	314
c46706_g1_i1	518	818	892	1053	802	604	470	500
c39292_g1_i1	360	580	542	691	471	406	288	268
c30434_g1_i1	329	474	360	445	509	327	238	234
c55845_g1_i2	2254	3242	3715	3413	8229	6847	3488	3356
c8266_g1_i1	78	117	112	122	138	114	48	53
c56061_g1_i1	124	144	46	45	57	54	16	20
c54676_g2_i4	713	1270	1069	1347	883	807	750	741
c41541_g2_i2	351	582	807	991	1137	941	601	665
c49854_g1_i7	183	279	186	205	291	233	148	179
c49194_g2_i2	399	590	564	611	608	536	408	346
c53760_g1_i4	236	339	265	299	440	336	185	214
c51600_g1_i1	1101	1606	2330	2120	1666	1541	1161	1073
c25355_g1_i1	939	1830	1242	1461	6087	4846	1690	2006
c46078_g1_i1	350	530	539	694	742	471	324	403
c52574_g1_i1	1231	1944	1329	1612	810	711	539	688
c50219_g1_i1	1190	1790	2869	2840	3036	2400	1811	1805
c48365_g1_i11	959	1493	1999	2500	1203	1075	1225	1111
c47735_g2_i4	449	719	723	827	942	860	505	480
c28447_g1_i1	2115	3116	2109	2720	2250	1709	751	776
c50894_g1_i1	111	162	78	103	62	51	69	75
c44241_g1_i2	307	470	494	574	678	581	432	413
c42705_g1_i1	431	819	943	936	728	723	274	254
c53341_g5_i3	359	451	439	402	578	590	286	285
c51092_g1_i2	410	580	515	616	540	465	360	366
c51977_g1_i2	537	945	808	957	763	730	439	426
c46568_g1_i1	454	702	433	496	894	840	576	544
c54546_g1_i5	50	70	90	95	192	115	52	62
c42339_g1_i1	164	695	53	59	3420	2207	584	554
c44779_g1_i1	2656	4189	3961	4518	3356	2791	2631	2404
c53117_g1_i1	946	1427	997	1137	862	756	761	831
c47028_g1_i6	76	120	166	177	424	236	207	240
c39020_g1_i1	544	763	753	858	1033	788	371	445
c49296_g1_i1	666	1107	1054	1267	1349	1178	753	722
c51961_g1_i1	191	193	303	497	73	58	38	48
c34713_g1_i2	0	0	137	172	63	65	40	55
c44446_g1_i1	696	1113	444	518	351	249	1512	1596
c36555_g1_i5	79	141	90	105	136	99	48	54
c35568_g1_i1	904	1208	1025	1170	1809	1115	654	719
c39542_g1_i1	221	438	390	446	406	358	200	174
c54305_g1_i1	382	490	434	501	471	507	383	332
c28740_g1_i1	211	370	381	475	432	339	236	246
c52030_g2_i1	172	378	271	334	272	267	135	140
c53027_g1_i5	629	954	760	944	809	715	438	425
c39021_g1_i1	319	450	490	629	498	490	409	348
c51897_g1_i2	611	1022	856	781	88	79	1118	1080
c49775_g1_i3	481	726	605	741	630	574	375	380
c50904_g2_i1	0	0	58	46	294	198	0	0
c47975_g1_i1	83	121	67	96	96	108	48	33
c54879_g1_i2	226	362	199	231	228	197	127	112
c40252_g1_i2	259	448	297	537	183	321	1577	1499
c53447_g1_i3	625	940	903	734	704	738	4	5
c45174_g1_i1	4846	6396	6772	7839	5758	5134	4274	4168
c56124_g2_i3	70	130	157	228	135	136	533	467
c44625_g1_i2	78	146	63	98	58	49	55	49
c22048_g1_i1	371	599	561	748	633	491	269	275
c50215_g1_i2	641	846	282	284	107	125	189	117
c53942_g1_i1	633	876	1376	1426	1253	1086	767	689
c35285_g2_i1	63	101	121	141	111	105	90	58
c55408_g1_i14	0	1	2	1	907	885	0	0
c53637_g1_i1	396	554	2206	1755	4307	3402	1780	1352
c47922_g1_i2	1779	3002	1969	2272	2178	1987	1064	1080
c44667_g1_i1	202	330	257	351	195	201	99	111
c53457_g1_i1	970	1585	1557	1927	1769	1685	1140	1084
c48645_g1_i3	426	594	406	670	116	111	95	129
c48663_g1_i1	1181	1894	1888	2063	2506	2067	1135	1080
c44199_g1_i2	138	236	261	310	236	209	118	95
c48702_g1_i1	82	122	127	139	102	109	36	38
c53095_g4_i1	132	229	274	267	192	152	115	86
c56606_g1_i7	83	154	839	1121	641	598	151	156
c46866_g1_i1	92	172	113	160	112	82	85	68
c41910_g1_i1	331	536	394	462	564	430	309	309
c55140_g1_i2	3718	6111	5019	5213	14	27	7811	7331
c52311_g1_i3	126	161	185	225	119	152	93	70
c54643_g3_i2	89	106	66	60	103	79	94	158
c47989_g2_i1	607	818	656	817	815	662	462	422
c33298_g1_i1	4538	7031	3871	4587	5368	4183	2238	2096
c41775_g1_i3	388	687	558	711	511	427	242	251
c53948_g1_i1	94	234	192	270	143	167	91	95
c55029_g1_i1	833	1321	1075	1293	1529	1554	1095	954
c48765_g1_i1	571	809	822	850	1671	1327	643	681
c48017_g5_i1	393	650	459	643	663	602	201	235
c55010_g2_i5	163	281	322	460	339	282	273	233
c53789_g1_i4	286	454	342	394	315	323	195	234
c35808_g1_i4	233	378	343	378	251	216	162	164
c51880_g1_i2	104	132	153	163	109	88	45	62
c55126_g1_i1	1054	1611	1346	1687	1102	1085	797	806
c46081_g1_i1	86	130	127	145	76	87	80	86
c46927_g1_i2	815	1260	1401	1630	1280	1074	594	557
c54974_g1_i1	5659	8525	10869	11788	14308	12339	5775	4902
c46935_g2_i1	81	142	107	169	9	13	10	10
c49176_g1_i1	95	109	575	1076	605	615	103	76
c45281_g1_i3	749	1132	1315	1576	1120	959	502	473
c33865_g1_i1	30	29	70	90	14	24	78	85
c52022_g1_i7	157	239	142	175	116	110	64	85
c53542_g3_i1	226	381	327	417	307	242	161	145
c51854_g4_i4	103	163	88	116	187	121	74	98
c50740_g1_i1	1075	1643	1884	2239	1827	1607	1223	999
c36588_g1_i2	246	360	382	382	303	310	177	165
c54005_g1_i8	497	932	799	1036	882	674	387	420
c54211_g1_i1	93	127	232	304	158	122	104	100
c49238_g1_i1	261	359	415	638	460	504	178	224
c45152_g1_i1	585	970	587	786	710	595	283	338
c39930_g2_i1	98	186	52	95	122	77	60	73
c37248_g1_i1	151	148	253	284	333	292	104	65
c53040_g1_i1	998	1675	1314	1411	2163	2189	1557	1460
c52495_g1_i2	64	91	104	150	130	92	68	75
c55443_g1_i4	132	170	55	77	185	212	80	56
c53162_g1_i8	265	421	484	604	446	460	237	214
c52862_g2_i4	145	177	248	334	175	131	123	118
c45374_g1_i1	548	861	987	1046	1041	884	718	707
c33937_g1_i1	106	206	153	152	195	108	129	86
c52892_g1_i1	404	753	722	903	783	654	370	372
c55320_g1_i3	194	347	319	403	311	298	213	194
c49356_g1_i1	113	139	178	195	188	183	176	92
c55398_g1_i1	211	276	257	398	215	236	202	117
c26707_g1_i1	85	133	136	200	82	64	53	56
c43275_g1_i1	297	592	518	616	1062	605	341	378
c48132_g1_i1	730	1180	881	1141	1181	942	630	559
c47252_g1_i2	117	180	220	271	178	121	80	85
c55490_g2_i2	1696	2793	2114	2625	3286	2838	1543	1578
c50448_g2_i2	73	124	122	163	164	141	118	103
c59637_g1_i1	1450	2148	2003	2381	2799	1495	968	1163
c54632_g1_i5	112	182	112	150	108	94	123	133
c49085_g1_i2	1933	2662	1978	2083	2397	2202	1875	1443
c53284_g3_i3	605	738	729	914	569	560	631	475
c46029_g1_i3	807	1556	672	898	408	354	331	319
c46563_g1_i4	745	1201	797	854	1743	1198	652	509
c40461_g1_i1	782	1281	1051	1228	1219	907	569	540
c50552_g1_i1	1264	1694	1870	2294	1019	953	747	683
c56271_g4_i2	116	146	184	231	142	138	58	47
c55442_g1_i1	204	299	347	356	846	798	257	243
c52448_g2_i1	1296	2786	2597	3788	549	715	686	914
c56281_g1_i1	482	806	765	955	693	675	401	483
c43733_g1_i1	82	166	98	125	103	77	27	36
c47657_g1_i1	83	111	129	206	64	65	51	20
c50154_g2_i2	119	210	347	418	227	186	172	154
c52478_g3_i4	89	141	271	308	75	52	5	6
c49401_g2_i1	146	255	182	220	144	115	128	112
c54500_g1_i2	101	154	129	159	263	211	50	44
c49480_g5_i4	75	104	52	58	80	61	116	99
c49480_g3_i2	1	0	394	404	324	445	340	269
c49907_g1_i1	124	209	155	169	605	691	278	255
c50916_g1_i6	1574	2393	2479	2756	3807	3252	1774	1766
c51469_g1_i2	150	237	277	356	251	197	146	140
c49633_g1_i2	24	32	21	36	8	10	95	102
c38718_g1_i2	73	119	134	157	128	116	100	83
c46633_g1_i1	130	215	205	295	160	147	116	115
c52045_g1_i5	204	306	430	603	294	319	232	231
c55731_g1_i5	225	349	353	412	56	71	77	49
c52680_g1_i1	368	543	374	459	344	320	216	244
c52347_g1_i3	68	99	91	140	409	371	79	134
c51897_g3_i2	41	73	70	60	143	168	45	44
c49136_g1_i1	1709	1944	1698	1809	4631	4040	7882	7375
c46685_g1_i1	5533	8474	7859	9803	8849	6813	4228	3857
c55919_g2_i1	1174	1478	930	991	1377	1625	1613	1389
c51618_g1_i1	245	403	282	345	372	277	248	284
c28683_g1_i1	239	348	410	505	460	344	243	188
c52560_g1_i1	6315	10608	10232	12226	13925	12415	7993	7374
c45689_g1_i4	282	516	244	283	2	2	1	2
c54293_g2_i2	155	247	281	353	250	237	150	156
c53911_g1_i1	611	880	2020	2983	383	322	1198	992
c27573_g1_i1	1570	2347	1886	1964	2241	1866	1549	1327
c53539_g1_i9	563	784	435	613	303	242	100	151
c53130_g1_i1	347	687	752	922	771	667	473	412
c31442_g1_i1	29	42	114	95	159	98	38	46
c53662_g2_i1	199	272	168	195	179	172	79	83
c51086_g1_i3	691	1209	2	9	893	661	1	0
c50768_g1_i5	268	437	315	380	307	301	166	185
c49396_g1_i1	0	3	3574	4620	720	534	29	4
c51380_g1_i3	593	989	847	1009	1151	953	566	597
c17985_g1_i1	2586	3881	3985	4996	4970	3781	2151	2156
c52062_g2_i4	184	208	205	220	249	282	250	238
c46982_g1_i4	122	132	52	44	55	36	29	46
c28045_g1_i1	88	179	86	106	81	58	66	106
c34313_g1_i1	348	554	510	583	711	518	264	287
c45880_g2_i2	323	486	387	425	499	388	280	271
c53963_g1_i8	569	956	790	964	777	785	428	446
c55948_g1_i1	3544	4748	3563	3620	5159	6290	5069	4157
c47047_g1_i2	2921	4379	9202	8837	15797	15098	8000	6750
c48487_g3_i2	89	223	279	301	65	56	63	53
c43639_g1_i1	1505	2279	3140	3447	2238	1567	1500	1316
c42788_g1_i4	278	413	360	454	401	373	280	302
c46174_g1_i1	780	1191	1776	2356	2014	1551	708	649
c56745_g3_i1	373	486	1486	1538	771	780	502	463
c51464_g1_i1	1089	1816	1594	2052	1584	1470	1118	1018
c44456_g1_i1	437	639	559	611	680	536	244	219
c49064_g1_i1	238	476	438	618	257	219	177	164
c7828_g1_i1	233	431	353	435	462	283	154	192
c54248_g1_i5	156	234	294	339	214	201	107	87
c51940_g1_i1	447	760	714	778	2039	1812	556	1010
c50165_g1_i1	81	120	98	145	77	78	52	47
c49602_g1_i1	411	664	484	594	493	401	361	361
c43343_g1_i2	219	355	258	359	24	31	172	200
c48410_g2_i3	56	101	137	183	90	57	68	56
c50699_g1_i1	1806	2420	3438	3550	3123	2930	4358	3609
c35359_g1_i1	458	771	783	948	1015	738	477	445
c50114_g1_i2	232	345	347	423	332	301	197	179
c54422_g1_i1	167	303	195	261	285	401	395	416
c51475_g1_i3	162	251	204	240	244	206	108	138
c3546_g1_i1	1403	2030	4372	4169	3978	3412	1857	2395
c37122_g1_i1	201	364	426	588	45	25	50	50
c52831_g2_i1	447	667	668	777	892	693	362	369
c50953_g1_i4	226	373	11	12	3	2	0	0
c47529_g2_i1	162	295	163	153	117	161	100	172
c53698_g2_i3	192	318	226	222	715	631	179	218
c51385_g5_i4	116	175	161	163	114	83	106	83
c56418_g2_i3	212	318	495	655	357	323	263	227
c44945_g1_i1	252	388	292	428	277	267	127	152
c50764_g1_i4	39	53	105	111	87	127	67	74
c40704_g1_i2	303	347	106	111	797	633	270	241
c55993_g1_i1	39	69	99	106	81	81	101	72
c53482_g1_i4	397	550	567	791	496	421	228	206
c51229_g1_i2	1276	2156	1277	1313	1462	1163	1332	1284
c54295_g3_i1	330	423	386	471	210	178	263	339
c52689_g2_i1	353	549	498	647	341	344	236	262
c45776_g1_i1	213	359	290	355	259	204	138	145
c55163_g2_i1	1213	1876	1807	2084	1762	1699	1061	989
c51522_g1_i1	193	303	188	251	322	283	130	133
c49358_g1_i1	135	183	135	154	60	32	43	44
c44407_g1_i1	801	1158	937	1246	806	809	432	465
c52615_g1_i1	440	754	551	732	510	434	262	275
c52758_g1_i1	240	354	326	345	320	257	109	134
c23014_g1_i3	211	382	292	338	549	303	127	141
c53856_g1_i3	184	278	252	322	328	302	208	162
c20093_g1_i1	169	295	3	3	217	246	0	0
c39649_g1_i1	47	120	820	888	239	315	2	7
c56711_g2_i1	642	987	502	498	437	456	430	389
c47956_g1_i7	86	119	109	152	109	112	71	62
c49093_g1_i2	0	0	766	899	75	45	232	253
c52193_g1_i5	97	132	178	217	266	192	73	143
c50022_g1_i4	162	285	153	221	242	191	110	127
c47108_g1_i2	138	172	276	343	274	260	128	108
c12560_g1_i1	341	589	830	461	1105	948	1892	1615
c56568_g2_i4	384	664	309	335	254	298	155	138
c35876_g1_i2	118	115	132	169	108	101	63	49
c54161_g3_i1	194	316	313	395	294	235	166	166
c51874_g1_i1	289	431	318	430	366	316	275	234
c56103_g2_i6	835	1203	1004	1188	1258	1084	627	600
c42798_g1_i2	162	250	1	0	1	1	0	0
c38504_g1_i1	172	240	98	137	166	99	48	61
c47115_g1_i2	143	225	237	333	237	197	131	140
c43936_g1_i4	266	402	305	410	339	286	216	261
c53996_g1_i7	31	48	124	153	142	167	53	34
c46920_g1_i1	85	125	98	141	71	49	37	37
c44568_g1_i1	215	312	298	297	280	251	142	155
c21440_g1_i2	394	577	801	797	515	455	259	223
c51346_g9_i1	195	313	333	390	162	164	188	185
c55580_g3_i2	146	201	116	103	98	108	63	49
c49565_g1_i4	374	570	439	681	121	119	105	139
c43514_g1_i2	191	219	218	292	167	172	116	100
c54455_g1_i4	1730	2372	3257	2883	2239	1792	2282	1830
c48894_g1_i6	318	559	507	660	682	569	379	370
c55694_g2_i2	26	35	21	19	116	141	72	71
c49304_g1_i1	167	260	392	470	375	237	145	138
c52731_g1_i1	75	90	123	127	105	103	43	57
c72618_g1_i1	35	64	0	0	0	0	127	113
c53026_g2_i1	1557	2378	2	6	13	10	1	0
c38903_g1_i1	77	107	122	173	95	73	36	22
c42204_g1_i1	203	290	228	294	198	137	120	138
c49768_g1_i1	1025	1677	1757	1978	2046	1760	1042	972
c37800_g1_i1	1546	2499	2091	2458	2374	1924	1106	1141
c54656_g1_i3	305	520	103	95	115	100	154	158
c54563_g1_i1	333	486	487	548	391	381	223	186
c51284_g1_i6	245	360	475	599	403	255	154	147
c32878_g1_i1	331	411	371	450	359	277	223	193
c41889_g1_i5	98	175	242	230	261	255	89	82
c54922_g3_i1	436	708	759	989	414	463	455	322
c53782_g1_i3	108	110	148	262	180	190	75	61
c33849_g1_i1	248	440	374	507	368	309	187	204
c45203_g1_i1	529	807	377	513	618	394	249	216
c39563_g1_i2	698	1141	860	1042	901	839	415	392
c49379_g1_i1	88	115	492	321	454	474	61	67
c51207_g1_i2	229	324	339	358	421	325	124	152
c56118_g1_i4	44	74	409	519	51	54	18	21
c45625_g2_i1	294	447	375	503	333	264	196	170
c54659_g1_i3	456	736	812	924	1047	1005	710	749
c56844_g1_i1	50	32	3778	1768	3822	3760	7612	3905
c50027_g2_i2	130	187	212	207	325	224	149	128
c53683_g3_i1	2200	2584	5372	4872	6191	5592	5150	5035
c37466_g1_i2	133	144	34	73	24	15	22	15
c23828_g1_i2	123	211	194	241	362	171	78	86
c55666_g1_i2	873	1308	1056	1324	1292	1240	816	778
c51945_g5_i1	86	152	145	196	89	61	62	63
c52985_g1_i1	1119	1820	1841	2286	2549	1614	930	1007
c49480_g2_i2	1	1	306	365	325	364	257	200
c35652_g1_i1	2065	2859	2985	2997	2168	1626	1403	1250
c55820_g1_i1	1974	3090	3156	4202	2684	2890	3118	2674
c51405_g3_i5	2333	3376	3263	3261	3480	3136	2400	1996
c50947_g1_i2	230	382	270	344	320	326	181	163
c47014_g1_i3	74	146	130	141	144	101	59	82
c42597_g1_i1	54	81	839	1097	237	139	62	51
c32262_g1_i1	82	129	84	97	75	74	54	57
c53231_g5_i1	296	440	380	521	376	293	271	240
c33693_g1_i2	114	178	195	265	362	231	75	126
c55154_g2_i2	115	161	52	86	26	38	20	31
c55558_g1_i1	831	1169	1325	1678	1310	1226	1189	981
c44757_g1_i2	218	276	274	264	229	190	133	111
c56535_g1_i2	1999	2747	3207	3895	2673	2554	5913	5952
c48603_g1_i1	1486	2536	2606	3152	3912	2439	1464	1510
c49130_g1_i1	2250	3622	3470	4044	5084	3630	2050	2058
c52908_g1_i1	743	952	1097	1246	1611	1346	1080	934
c29362_g1_i5	0	0	186	273	0	0	0	0
c55934_g1_i1	138	250	101	129	127	139	105	139
c54110_g1_i2	1103	1741	1775	2340	2070	1930	1160	1215
c55077_g1_i1	720	1120	1094	1306	1119	956	667	509
c55358_g1_i2	875	1143	730	1005	561	499	476	329
c70926_g1_i1	837	1271	1273	1482	1412	1029	702	720
c45556_g1_i1	322	550	432	489	391	352	248	194
c51063_g1_i3	429	668	629	640	1045	832	429	432
c56371_g1_i3	193	234	199	202	155	139	57	43
c54371_g2_i1	113	190	64	79	101	101	39	48
c40462_g1_i1	108	210	0	2	0	0	0	0
c19685_g1_i1	3183	4154	3517	3847	3609	2229	1369	1684
c37060_g1_i1	137	244	197	187	115	92	106	97
c46082_g1_i1	468	703	486	710	812	801	388	383
c55518_g2_i1	336	499	70	91	403	387	236	238
c41715_g2_i2	86	149	109	174	153	88	40	32
c5785_g1_i1	304	473	400	485	597	422	204	255
c49378_g2_i1	99	132	97	82	81	89	59	66
c56565_g1_i1	540	768	1063	1138	985	1091	885	612
c50731_g2_i1	187	171	206	237	173	166	139	116
c44116_g1_i1	99	154	127	149	127	117	52	45
c53101_g1_i3	111	172	50	53	49	24	20	34
c58308_g1_i1	1156	2008	1890	2350	1283	935	515	543
c32357_g1_i1	110	163	119	132	204	99	38	55
c54926_g1_i2	398	509	357	511	307	323	192	165
c51346_g8_i4	687	1109	598	843	607	463	327	362
c34933_g1_i2	334	518	413	488	456	391	234	237
c54802_g1_i3	235	322	188	259	66	65	95	87
c51865_g1_i5	94	121	170	141	192	156	78	82
c50680_g1_i1	681	1021	957	1104	968	801	480	464
c49003_g1_i4	202	324	332	343	366	248	96	108
c53431_g2_i3	335	483	598	653	732	720	400	365
c52804_g1_i1	308	459	237	312	382	318	182	207
c49104_g2_i3	137	209	1	2	209	207	0	0
c37488_g1_i2	0	0	0	0	334	268	97	99
c50023_g1_i8	240	403	365	506	400	337	168	206
c54893_g1_i1	399	658	510	684	700	657	337	344
c38884_g1_i2	0	0	200	249	0	1	0	0
c52828_g1_i3	72	135	144	175	103	89	68	74
c37410_g1_i1	371	667	452	571	1058	888	399	602
c36358_g1_i1	155	337	66	77	277	207	14	21
c48836_g1_i1	457	660	1041	1051	1131	1088	664	635
c54808_g1_i4	948	1256	1490	1910	1190	1071	735	630
c56177_g1_i1	212	235	211	309	174	144	96	90
c50117_g1_i2	121	145	69	140	38	27	11	10
c55662_g1_i2	202	348	250	334	142	129	110	115
c41584_g1_i2	39	69	44	56	0	0	111	100
c48307_g1_i2	137	208	125	154	199	135	74	88
c42236_g1_i1	1864	2320	1859	3315	1488	1178	122	212
c54689_g4_i1	166	359	256	378	300	317	141	172
c59789_g1_i1	112	192	192	296	173	129	62	93
c40668_g1_i1	474	571	825	1013	550	416	437	331
c52793_g1_i1	428	488	486	537	673	576	318	299
c46842_g1_i2	971	1390	872	840	1008	680	804	621
c37730_g1_i1	21	50	187	262	88	66	91	66
c56701_g1_i1	651	881	779	1161	880	945	707	526
c43359_g1_i1	448	721	611	750	889	612	316	355
c21821_g1_i1	138	208	212	278	294	209	118	125
c48548_g1_i1	685	843	861	961	1318	1189	729	666
c50405_g1_i1	981	1525	1487	1819	1438	1130	726	682
c46291_g1_i1	177	225	254	301	224	203	186	120
c46238_g1_i1	4023	5502	3859	4344	7854	5196	2366	2888
c46779_g1_i4	740	934	1458	1023	2018	1666	1169	992
c34904_g1_i3	221	428	346	425	315	268	171	218
c16014_g1_i1	160	221	233	267	311	224	91	94
c55546_g1_i7	687	975	827	1189	1422	1244	619	576
c39384_g1_i1	474	755	715	763	877	754	374	358
c51231_g3_i2	0	0	248	372	300	212	0	0
c42491_g1_i1	1	1	135	271	90	149	7	1
c49539_g1_i3	136	174	207	259	204	210	107	108
c51532_g4_i1	0	0	148	286	123	135	25	6
c46887_g1_i3	117	203	90	113	178	140	118	131
c51051_g1_i4	141	218	294	346	451	436	216	216
c26968_g1_i1	574	1034	681	820	1270	845	496	557
c56286_g1_i4	621	958	1001	1216	953	743	414	354
c53820_g1_i3	461	639	989	900	927	855	775	661
c47512_g1_i3	423	639	582	722	918	738	357	391
c50988_g1_i3	800	1416	804	899	1459	1245	520	569
c54407_g2_i2	218	397	872	915	1108	963	380	406
c37271_g1_i1	1844	2974	2396	2889	2884	2116	1305	1318
c42585_g1_i2	560	871	649	782	681	469	290	294
c68172_g1_i1	1590	2041	53	37	2965	2159	607	696
c54016_g1_i4	112	186	150	140	49	42	18	18
c44469_g1_i4	1898	2791	2225	2899	2683	2333	3087	4918
c46295_g1_i1	369	637	608	782	678	482	407	421
c50849_g1_i1	269	425	289	384	309	283	189	176
c38780_g1_i1	4854	6905	3235	2148	13317	9944	6612	6296
c35140_g1_i1	45	63	38	66	23	19	128	132
c48274_g1_i1	864	1070	1348	1584	1299	1182	713	685
c17454_g1_i1	179	280	293	375	339	237	189	200
c50307_g3_i1	107	171	27	41	122	62	52	69
c53619_g1_i2	323	545	477	609	457	395	244	263
c39006_g1_i1	132	217	104	113	226	160	44	62
c54931_g1_i4	249	382	380	468	306	276	194	180
c55337_g2_i1	103	170	150	169	91	94	66	71
c43077_g1_i1	104	181	201	200	177	155	108	105
c56746_g1_i1	2144	3633	2706	3378	5632	5642	2267	2090
c33747_g1_i2	293	337	408	572	275	279	210	137
c49891_g1_i1	543	851	846	1041	784	618	484	434
c35662_g1_i1	44	58	4	2	191	163	0	0
c18535_g1_i1	155	250	255	319	253	162	118	122
c44771_g3_i1	802	1061	1300	1424	2008	1650	1014	1058
c40445_g1_i2	236	420	358	421	406	291	181	173
c41083_g1_i2	488	724	763	949	1155	967	475	528
c65352_g1_i1	94	138	236	290	351	197	111	151
c34783_g1_i2	246	458	423	578	389	340	131	133
c55417_g3_i3	413	689	514	623	542	508	263	335
c47071_g1_i4	316	555	317	390	314	255	160	183
c55141_g2_i3	646	1093	743	821	910	828	425	424
c52437_g1_i4	136	221	157	242	190	127	71	87
c42661_g2_i2	315	302	412	494	216	232	227	122
c44110_g1_i1	1028	1689	1499	1883	1800	1524	802	722
c48372_g1_i3	718	1031	1183	1449	1018	912	514	520
c56332_g2_i12	910	1297	993	1123	954	828	623	644
c55991_g1_i1	464	606	847	1199	461	530	342	249
c56587_g1_i1	287	513	585	727	482	432	344	349
c31332_g1_i2	139	225	4	1	0	0	15	18
c55735_g1_i6	3	21	83	73	165	132	71	57
c56692_g3_i2	251	391	270	337	299	320	215	201
c48383_g1_i1	118	137	66	76	49	44	29	29
c56536_g1_i1	1729	2613	4817	4356	5057	5240	5460	4559
c38989_g1_i1	319	461	278	325	214	124	99	102
c53390_g1_i1	196	275	303	427	203	197	107	101
c23725_g1_i1	1206	1752	1871	2497	1433	1232	613	644
c53653_g2_i1	1391	2080	2023	2022	5970	5292	2196	2053
c54751_g2_i19	750	1181	12	19	3	2	3	6
c56407_g4_i1	100	147	4	7	50	36	1	2
c42995_g1_i3	118	213	97	112	99	99	70	59
c56727_g1_i2	180	305	149	137	170	201	113	89
c55794_g1_i1	404	608	620	886	119	110	124	213
c38872_g1_i1	129	168	190	228	183	160	94	87
c50305_g1_i1	897	1101	755	1005	630	571	649	418
c35620_g1_i2	114	133	142	136	122	79	59	76
c38360_g1_i1	774	1408	773	1074	155	159	232	361
c65631_g1_i1	0	0	119	172	80	69	46	53
c56264_g1_i1	1500	2143	1904	2649	1617	1389	753	688
c56577_g2_i3	508	786	538	742	837	794	415	407
c32715_g1_i2	113	197	163	194	184	142	83	100
c51916_g2_i1	120	208	299	389	203	158	157	152
c42869_g1_i1	2	1	137	105	0	0	131	94
c52137_g1_i7	461	796	512	704	503	568	555	548
c53923_g1_i12	763	963	811	1043	494	551	456	426
c44657_g1_i1	1685	2661	2140	2488	2987	2246	1286	1243
c51613_g1_i4	467	809	761	966	702	664	386	410
c47566_g1_i1	260	447	299	400	695	568	359	323
c14964_g1_i1	101	182	112	88	227	174	104	138
c40724_g1_i1	140	209	273	329	101	81	140	138
c45354_g1_i1	43	59	125	143	48	35	234	204
c47140_g1_i1	312	510	414	522	501	317	121	90
c55394_g1_i3	204	219	404	359	214	214	63	43
c51085_g1_i3	826	1168	947	1173	1112	893	609	586
c55142_g1_i2	276	411	328	483	306	306	177	165
c54685_g2_i5	125	139	189	214	203	166	92	93
c35061_g1_i1	36	53	118	153	41	45	67	49
c53861_g2_i2	52	106	106	158	137	113	40	50
c56240_g1_i5	413	661	479	681	437	414	252	233
c45043_g1_i1	380	665	595	719	678	662	541	672
c44887_g1_i2	141	235	248	266	314	234	192	187
c56226_g1_i3	1357	1771	1141	1351	841	714	1782	1468
c50776_g4_i1	121	123	141	126	118	122	102	79
c55768_g1_i8	270	330	333	503	270	258	207	168
c52754_g1_i6	197	325	265	329	260	250	123	157
c49485_g6_i3	143	217	141	153	212	138	53	72
c54289_g1_i2	109	191	185	210	111	108	54	45
c55208_g1_i1	547	687	1043	1542	371	295	236	207
c44348_g1_i1	494	814	742	1062	651	577	445	449
c13053_g1_i1	649	834	524	616	595	718	330	246
c48877_g2_i1	191	172	206	205	196	115	143	125
c39589_g1_i2	285	534	330	423	304	247	182	180
c44792_g1_i1	273	381	216	273	251	176	109	122
c26324_g1_i1	135	221	151	196	153	121	85	76
c54564_g1_i6	178	275	217	292	195	168	146	137
c25139_g1_i1	3905	4494	3437	4668	3904	3500	2004	1790
c50085_g1_i1	1555	2158	2216	2381	3456	3033	2130	1729
c26463_g1_i1	121	180	104	122	196	142	77	75
c37496_g1_i1	92	136	168	198	209	166	89	92
c53234_g2_i2	168	281	245	298	135	128	191	188
c51053_g1_i8	141	205	162	189	136	86	63	68
c48233_g1_i2	698	981	674	819	999	925	541	525
c54528_g1_i3	1082	1626	1652	1742	1661	1653	1523	1129
c52037_g2_i1	70	131	82	96	102	106	62	87
c55852_g1_i3	875	1514	933	1056	1002	937	662	623
c46485_g1_i6	257	396	292	396	376	314	191	179
c47316_g1_i1	650	836	795	910	1918	1816	586	608
c52583_g2_i1	154	204	133	200	117	141	32	34
c52016_g1_i1	295	491	473	548	396	365	247	232
c54343_g1_i3	175	220	196	227	103	85	44	47
c28448_g1_i1	554	734	427	603	531	399	279	291
c52425_g1_i5	349	606	458	545	617	533	293	262
c50027_g1_i7	264	399	642	498	703	587	422	351
c47930_g1_i1	255	385	70	98	120	109	26	48
c44674_g1_i2	1108	1754	1646	1965	1128	1092	955	1068
c38841_g1_i1	184	298	269	252	274	292	155	207
c55275_g1_i7	574	765	805	987	614	590	450	410
c40386_g1_i1	1717	2109	2146	2268	4120	3925	3440	2165
c50628_g4_i2	2452	3728	2912	3701	1024	1036	1086	976
c38289_g1_i1	29	16	1005	352	2426	2251	1123	309
c35389_g1_i1	857	1283	1224	1553	1589	1073	630	703
c27583_g1_i1	14	32	25	35	3	1	89	98
c45135_g2_i3	711	1167	690	980	817	692	329	318
c35422_g1_i3	1464	2198	1589	1555	1253	1173	1484	1324
c54984_g2_i1	254	386	322	554	193	180	182	180
c50108_g1_i1	444	679	655	791	660	636	366	359
c49060_g1_i1	533	699	1374	1140	1506	1458	1079	800
c35386_g1_i1	105	148	117	150	39	43	16	21
c46961_g1_i1	135	210	282	344	209	209	63	67
c53224_g1_i1	493	759	733	951	536	538	378	342
c44046_g1_i2	262	415	324	421	398	270	140	147
c44624_g1_i4	84	134	96	140	191	152	83	91
c46772_g1_i5	76	100	180	267	170	160	146	166
c55218_g1_i3	203	273	197	252	236	261	157	183
c50357_g1_i1	41	87	161	186	60	83	81	92
c51890_g1_i1	1156	1583	1299	1378	886	1019	1134	845
c56006_g1_i1	15	19	369	457	293	336	167	106
c48693_g1_i1	158	284	241	334	314	196	99	143
c52078_g1_i2	83	115	222	258	163	151	132	94
c53622_g3_i1	108	240	154	201	122	114	48	77
c46654_g1_i1	239	381	424	537	630	497	328	304
c48240_g2_i2	134	258	131	170	190	162	82	110
c56614_g2_i1	349	618	556	660	458	454	401	372
c47829_g1_i6	571	772	509	689	339	325	418	329
c40915_g1_i2	68	119	110	139	130	101	40	56
c43807_g1_i2	538	771	716	787	1344	1010	546	486
c48272_g1_i4	262	364	272	307	321	288	195	232
c53039_g1_i3	507	732	748	877	1033	1059	748	680
c49057_g3_i1	120	180	124	200	124	107	127	106
c54132_g1_i1	3745	5087	4914	6217	3380	3336	3184	2380
c54613_g1_i1	68	182	260	418	224	248	58	7
c55907_g2_i5	422	635	325	352	314	342	276	253
c49492_g1_i3	175	279	18	12	76	86	11	10
c54991_g1_i5	621	877	618	770	758	655	336	394
c40613_g1_i1	862	1348	1524	1918	1288	996	717	693
c54827_g5_i2	1495	2072	2909	2737	12318	10323	2104	2021
c30188_g1_i1	0	0	121	141	0	0	0	0
c54752_g1_i21	343	532	292	341	370	389	231	222
c48961_g1_i1	187	256	210	278	208	184	88	82
c49868_g1_i1	375	647	365	507	504	422	214	228
c46381_g1_i1	87	117	138	187	102	91	51	44
c50708_g3_i2	133	233	577	584	610	564	526	553
c52603_g2_i3	125	204	156	148	357	235	103	91
c49523_g1_i1	102	168	111	198	81	70	24	31
c54070_g1_i3	192	279	261	318	258	213	133	149
c50323_g1_i2	78	120	112	138	74	85	62	62
c56334_g1_i3	317	502	824	824	551	575	511	558
c35690_g1_i2	313	551	535	641	435	365	249	213
c42670_g1_i3	112	147	190	215	201	131	99	94
c48740_g1_i3	363	571	619	800	583	528	303	338
c53575_g3_i2	111	141	221	291	207	168	90	117
c42366_g1_i1	530	767	528	673	634	471	267	258
c55486_g1_i1	341	798	1232	1322	397	340	453	486
c34121_g1_i1	165	329	264	367	36	29	91	66
c49351_g1_i6	92	112	110	131	89	106	49	49
c50432_g1_i2	938	1445	1339	1595	1227	1153	814	756
c50827_g3_i3	287	393	506	538	503	393	263	227
c45304_g2_i1	124	164	282	425	368	263	112	126
c54103_g1_i1	420	596	149	211	198	158	61	86
c42552_g1_i1	278	427	506	753	330	221	215	198
c31849_g1_i1	696	1048	872	1135	956	850	437	502
c56601_g1_i1	286	465	555	794	568	599	370	363
c49599_g1_i5	82	123	120	143	107	81	55	60
c50921_g2_i1	141	169	144	223	120	123	85	81
c46055_g1_i1	515	789	833	1129	796	641	428	386
c49121_g1_i1	123	193	158	170	259	243	135	149
c41168_g1_i2	834	1376	1116	1310	1638	1187	716	694
c47669_g1_i1	5825	9892	11490	14245	11407	9802	4365	4066
c53240_g2_i3	1026	1851	1470	1747	1736	1516	1099	1260
c51127_g1_i1	5880	8393	8282	9955	7173	5801	3826	3318
c55011_g1_i4	873	1345	1216	1495	1106	1071	785	554
c54121_g1_i4	142	229	238	280	239	166	124	135
c51000_g1_i1	341	587	469	595	475	396	236	283
c56747_g1_i2	122	197	221	274	252	226	121	118
c40566_g1_i1	5026	11066	10454	14312	2031	2591	2977	4971
c37300_g1_i1	191	288	310	457	302	192	0	0
c55589_g1_i6	401	636	318	439	411	347	200	194
c54658_g1_i3	716	810	486	657	370	271	227	172
c45759_g1_i2	101	166	225	246	239	207	108	120
c53855_g1_i2	669	1051	772	948	746	756	481	453
c53676_g2_i1	1215	2131	682	1020	1165	1033	178	143
c35868_g1_i2	269	434	401	436	968	600	190	216
c25027_g1_i1	67233	102344	117954	132208	126164	107424	77224	71502
c39189_g1_i1	460	795	812	915	553	502	415	341
c56261_g1_i3	883	1304	831	953	1256	1166	666	631
c29605_g1_i1	193	309	332	392	342	314	167	192
c41134_g1_i3	68	81	113	130	229	140	90	139
c54469_g1_i1	392	694	615	696	592	495	303	356
c49819_g1_i2	469	679	567	770	582	518	355	300
c51786_g1_i1	160	219	266	361	115	118	97	72
c37683_g1_i1	217	353	537	500	961	736	308	321
c44954_g1_i1	482	750	453	516	638	455	335	351
c60338_g1_i1	133	232	280	342	155	98	129	137
c53655_g2_i1	122	192	237	248	328	287	172	176
c50284_g1_i1	105	178	268	319	143	155	132	151
c56741_g1_i1	1262	1726	1804	2557	1849	2087	1607	1355
c41950_g1_i1	191	267	223	302	217	137	140	165
c51978_g1_i1	294	490	371	475	393	347	158	204
c38973_g1_i1	2	5	32	44	103	116	80	69
c38866_g1_i1	107	171	86	119	94	49	35	38
c52674_g1_i1	7	10	246	313	23	22	67	44
c38657_g1_i1	2919	4597	3904	4462	5333	4581	2271	2175
c51998_g2_i1	140	160	219	197	133	121	84	77
c45802_g1_i2	193	245	256	268	198	177	119	109
c13689_g1_i1	292	497	433	526	611	386	205	226
c54923_g1_i2	798	1074	941	1081	2971	2945	698	699
c50378_g1_i1	55	75	152	181	4	4	43	39
c40282_g1_i1	121	147	41	61	41	46	37	35
c46305_g1_i3	111	158	194	210	143	131	116	131
c55639_g1_i3	7	6	322	601	167	139	5	3
c43606_g1_i2	501	815	1114	1348	1100	1056	568	591
c46087_g1_i2	606	834	808	976	731	670	462	402
c39229_g1_i1	1204	1973	2210	2417	3342	2557	1994	1980
c55830_g2_i1	3887	4757	4851	6157	2999	2941	3028	2119
c46972_g1_i1	290	399	298	461	331	224	107	149
c52813_g1_i1	492	723	546	667	620	542	360	404
c24138_g1_i1	127	203	142	165	245	168	69	112
c49445_g3_i8	176	292	281	393	316	257	181	216
c50217_g2_i3	162	222	213	310	140	137	108	74
c22389_g1_i1	1452	2039	1712	1891	2800	2117	983	1028
c9361_g1_i1	128	212	314	388	190	169	170	144
c49449_g2_i1	143	155	170	174	208	215	171	145
c11813_g1_i1	1112	1740	1424	1840	2030	1343	782	815
c49832_g1_i2	127	207	163	206	186	128	100	95
c44701_g1_i1	822	1373	1290	1503	1608	1424	937	926
c50611_g1_i1	535	651	476	556	654	564	364	280
c26257_g1_i1	139	160	130	151	106	110	98	94
c24960_g1_i1	887	1261	1138	1445	1263	905	525	564
c53695_g2_i1	158	200	71	125	50	53	106	89
c58479_g1_i1	0	0	1	1	160	168	0	0
c53898_g1_i3	192	275	183	253	232	146	90	99
c54326_g2_i3	489	717	652	685	828	786	411	406
c46855_g1_i10	731	1419	1380	1863	1186	1117	927	910
c48050_g1_i2	96	151	100	153	72	69	29	60
c27746_g1_i1	391	659	614	779	916	520	307	326
c40499_g1_i2	204	273	287	312	259	246	132	157
c43049_g1_i1	387	588	508	623	504	365	222	241
c53473_g1_i1	505	717	533	700	558	426	261	366
c45813_g1_i4	173	297	84	124	144	118	90	120
c56744_g1_i2	1117	2088	1642	2054	1391	1476	1199	1117
c34076_g1_i1	2610	3968	3353	4031	5114	3613	2033	2146
c41833_g1_i2	421	702	495	554	501	434	364	375
c42835_g1_i1	7027	11155	7989	8621	8139	6313	3919	3254
c54780_g2_i10	96	181	287	273	564	557	304	424
c52409_g1_i1	413	623	653	758	770	636	416	342
c41150_g1_i1	80	170	212	248	321	206	119	120
c56432_g1_i1	572	891	837	1054	826	817	630	580
c38688_g1_i1	100	175	153	181	137	131	85	77
c54711_g3_i3	71	86	115	132	55	52	30	36
c32665_g1_i1	734	1083	1429	1443	4523	3209	1563	1283
c55044_g1_i1	149	198	158	219	213	197	128	100
c56128_g1_i1	1429	2291	2157	2780	2350	2487	1967	1617
c53678_g1_i1	121	337	1955	2800	1661	2340	670	597
c51233_g1_i1	398	468	516	452	772	717	236	204
c11386_g1_i1	147	247	241	310	295	186	126	104
c53522_g2_i1	193	269	124	136	142	144	83	79
c54811_g3_i1	281	313	263	310	176	166	106	84
c48331_g2_i1	1206	1985	1855	2369	2417	2042	1234	1332
c44560_g2_i1	847	1376	1489	1805	1547	1375	814	809
c37703_g1_i1	35	46	99	130	130	69	64	52
c41029_g1_i1	625	974	352	466	137	135	113	101
c55445_g2_i2	111	199	8	6	1	2	0	0
c53920_g3_i1	3212	4412	5856	6627	3426	3461	3325	2580
c48487_g4_i1	31	45	29	40	167	180	316	397
c49706_g2_i1	202	295	223	282	52	55	0	0
c59876_g1_i1	141	167	161	205	186	135	0	1
c48679_g1_i1	112	176	122	144	151	138	80	81
c55138_g1_i2	1014	1903	2898	3774	2495	3118	3305	3162
c45812_g1_i2	625	974	1252	1377	1403	1000	635	667
c54350_g1_i1	67	145	92	176	89	80	31	39
c52365_g3_i1	400	602	400	482	451	355	263	256
c47812_g1_i3	1112	1961	1631	1915	1631	1565	885	931
c32799_g1_i1	555	766	805	938	1048	702	436	452
c54713_g4_i1	94	148	157	191	140	146	81	83
c52366_g1_i2	2	4	4	11	201	135	25	0
c68296_g1_i1	126	233	50	67	161	138	44	38
c51453_g2_i6	268	378	295	322	674	678	187	161
c36437_g1_i1	77	138	88	90	99	72	37	51
c49235_g1_i3	127	180	118	141	180	170	91	77
c50732_g2_i3	198	332	303	368	350	269	130	173
c43696_g1_i2	478	867	602	841	905	615	296	371
c49232_g1_i1	126	181	193	186	199	206	142	124
c49513_g2_i3	267	549	559	831	312	270	138	245
c42901_g1_i1	63	85	151	271	245	197	49	37
c40589_g1_i2	271	372	478	495	475	410	277	273
c55829_g1_i3	59	102	69	64	97	91	110	83
c14083_g1_i1	5824	8577	7496	8654	11730	7294	4179	4123
c43074_g2_i1	89	122	165	201	134	121	122	126
c44297_g1_i1	2007	3143	2615	2685	3036	2716	1982	1783
c51695_g6_i1	177	288	289	281	241	207	243	209
c38068_g1_i1	184	240	123	130	13	14	225	241
c48419_g1_i2	985	1406	1046	1266	854	755	447	410
c53250_g1_i4	197	362	373	444	326	236	164	194
c34797_g1_i1	105	165	177	243	186	121	68	80
c50924_g1_i2	130	138	145	186	58	67	104	74
c59794_g1_i1	271	436	307	361	460	284	149	175
c54663_g1_i5	94	107	63	74	124	116	40	35
c49845_g1_i2	0	0	161	211	53	60	0	0
c48739_g1_i1	2080	3160	2475	3012	2580	2225	1492	1412
c37351_g1_i1	344	653	720	751	900	808	572	753
c47546_g1_i1	50	65	97	113	77	56	99	105
c54425_g3_i10	86	116	119	178	84	86	100	125
c29420_g1_i1	190	202	0	4	0	1	33	32
c42108_g1_i1	552	971	796	1040	880	677	440	431
c39093_g1_i1	98	145	50	88	37	40	31	45
c50797_g1_i1	1487	2542	2163	2421	2020	1933	988	845
c38061_g1_i2	95	180	160	163	0	0	0	0
c39698_g1_i1	665	986	1255	1390	1742	990	537	642
c46737_g1_i1	758	903	1360	934	3749	2813	2524	2478
c55672_g1_i8	166	284	554	517	138	116	172	149
c45189_g1_i3	59	105	141	244	50	54	42	73
c47146_g1_i3	1058	1034	493	785	383	277	178	109
c42469_g1_i2	326	521	272	339	507	372	171	173
c42092_g1_i1	100	150	123	115	155	153	139	87
c54910_g1_i4	454	775	449	657	773	782	233	245
c55335_g3_i2	99	142	127	210	50	49	6	3
c51833_g2_i1	657	1154	896	1288	1270	1277	929	877
c176_g1_i1	239	422	1237	1421	1222	846	793	892
c51257_g2_i1	16	16	142	169	226	249	104	124
c56284_g1_i2	468	566	418	661	239	268	277	194
c52446_g2_i2	2	1	1	1	558	583	0	0
c54724_g2_i6	873	1328	557	672	804	579	343	407
c53079_g1_i2	96	187	125	156	169	147	55	62
c50051_g1_i3	185	329	319	392	208	246	131	124
c50373_g1_i1	322	400	539	749	373	354	277	210
c48764_g1_i1	934	1565	1863	2141	1535	1247	919	799
c34833_g1_i1	240	355	455	501	865	615	369	339
c44410_g1_i1	641	982	911	1069	910	874	701	673
c36472_g1_i2	1228	1448	1478	1445	1009	963	952	737
c56500_g1_i3	133	176	119	131	284	282	55	68
c55841_g1_i11	552	868	283	344	490	509	255	316
c47852_g1_i7	82	144	75	89	45	46	3	6
c53871_g1_i1	532	806	859	1116	671	557	484	395
c53582_g1_i1	351	469	453	568	139	115	199	158
c43370_g1_i1	318	436	224	331	336	201	85	95
c44218_g1_i3	205	305	306	313	360	298	168	142
c47852_g2_i3	127	151	95	86	55	74	4	10
c54089_g1_i1	1075	1618	1606	2030	1485	1194	826	734
c53329_g1_i1	367	535	393	419	841	749	375	328
c54386_g1_i12	160	239	233	292	269	241	155	142
c46192_g1_i2	2921	4074	3750	4035	4120	3483	2474	2157
c49402_g1_i4	280	396	288	337	837	627	6	11
c38174_g1_i2	587	1227	7	14	1188	1181	6	1
c25140_g1_i1	4569	7175	6766	8042	9985	7200	3466	3594
c42423_g1_i2	93	108	101	128	130	128	62	61
c62905_g1_i1	0	0	129	165	1	0	74	80
c51170_g2_i2	123	170	161	172	211	180	147	145
c52709_g1_i5	253	362	265	289	264	226	139	181
c34843_g1_i1	457	697	441	469	1021	864	677	669
c56296_g1_i3	340	471	558	693	576	561	539	451
c54081_g1_i1	141	140	105	152	55	60	77	72
c55433_g3_i1	271	429	442	442	498	333	234	253
c51516_g2_i3	526	938	472	643	281	298	204	221
c47843_g1_i2	66	112	116	149	78	52	51	40
c38499_g1_i1	0	0	2	0	400	338	0	0
c46406_g1_i3	132	212	147	202	347	231	90	106
c43245_g1_i1	112	157	146	202	142	96	67	60
c51222_g1_i1	287	462	444	549	409	346	226	247
c52563_g1_i3	643	893	544	683	585	719	238	274
c31745_g1_i1	217	425	360	484	391	320	174	210
c52889_g1_i1	979	1459	1713	1772	1503	1364	959	836
c54918_g3_i1	805	1163	890	1106	827	750	482	427
c20443_g1_i1	1833	2710	1647	1799	1996	1486	623	718
c36980_g1_i3	275	330	553	535	620	565	455	293
c52264_g1_i1	793	1260	1526	1247	2632	2374	1465	1227
c43563_g1_i1	141	212	204	272	190	137	115	125
c5694_g1_i1	459	761	680	895	627	527	253	239
c44289_g1_i1	321	507	593	931	491	457	250	296
c54854_g4_i1	235	326	321	406	197	198	157	118
c37260_g1_i1	80	121	146	196	325	293	210	220
c45443_g1_i1	154	175	156	205	99	99	128	118
c53332_g1_i3	109	181	109	193	186	149	68	78
c38179_g1_i1	143	225	159	210	174	150	106	75
c39107_g1_i1	522	827	705	825	755	514	339	335
c40733_g1_i1	219	359	301	362	328	280	176	176
c44981_g1_i1	209	349	246	291	300	248	165	170
c44888_g1_i2	147	261	188	238	259	181	82	105
c50045_g1_i1	105	209	125	196	130	115	86	86
c52234_g1_i1	451	655	469	555	495	388	205	226
c33536_g1_i1	160	257	23	32	62	42	18	21
c46099_g1_i2	64	103	157	229	112	104	77	72
c54767_g1_i2	930	1507	1462	1733	1340	1144	617	609
c53818_g1_i2	266	337	366	448	372	350	348	255
c51979_g1_i1	705	1015	929	1034	1261	1080	693	624
c41986_g1_i2	926	1445	433	411	164	137	671	529
c43396_g1_i2	465	591	667	750	1101	801	527	606
c48470_g1_i2	105	172	234	284	174	132	89	93
c54389_g1_i2	1403	2127	2127	2603	1970	1963	1157	1261
c50497_g2_i8	14	23	13	8	716	524	11	5
c48943_g1_i2	68	127	92	114	117	138	57	38
c47879_g1_i2	301	453	390	463	418	331	183	186
c49882_g1_i7	864	1239	850	1083	844	779	448	481
c48434_g2_i1	88	106	119	155	107	119	60	58
c34043_g1_i2	904	1525	1257	1463	1315	1238	807	701
c36670_g1_i1	129	165	142	160	107	106	55	64
c13765_g1_i1	1	0	64	67	1296	926	0	0
c54447_g2_i4	91	155	93	129	82	63	54	71
c30923_g1_i1	734	1118	1019	1079	1788	1331	689	724
c47840_g1_i4	248	381	326	390	463	381	174	163
c52406_g1_i6	602	907	792	1035	1425	1252	663	760
c42574_g1_i1	2949	4652	5572	6955	5194	5138	2620	2624
c54677_g1_i1	146	179	260	260	256	182	146	130
c55251_g1_i16	3580	6920	4271	5174	3775	3787	3422	3265
c40764_g1_i1	107	161	161	192	115	98	79	77
c54459_g1_i3	276	421	226	183	1896	1745	1028	1013
c48755_g1_i1	504	840	835	1038	675	674	395	353
c28821_g1_i3	263	466	267	337	289	220	110	106
c54378_g1_i1	961	1906	1738	1992	2066	1505	572	918
c50933_g3_i1	56	72	207	243	140	117	89	91
c45487_g1_i1	160	171	80	135	29	23	41	38
c45896_g1_i1	887	1502	1706	2298	1662	1457	644	746
c43381_g1_i6	0	1	13	7	730	634	254	211
c66643_g1_i1	0	0	17	35	24	33	435	396
c36551_g1_i3	350	508	204	354	122	111	99	84
c55068_g1_i5	205	369	296	349	350	270	177	232
c52739_g1_i1	239	447	370	388	691	638	370	459
c45086_g1_i1	87	117	82	98	33	34	37	31
c45908_g1_i3	116	198	176	227	194	203	64	91
c49753_g1_i1	426	569	576	728	319	321	320	292
c49086_g1_i1	90	133	135	160	105	86	64	59
c9043_g1_i1	72	80	109	124	153	113	63	59
c49687_g5_i1	112	211	217	249	234	163	109	104
c54176_g2_i2	163	358	251	339	199	184	124	139
c43625_g1_i2	46	99	160	227	84	75	54	53
c26500_g1_i1	961	1636	1222	1346	1473	960	590	610
c38730_g1_i1	385	497	656	702	610	512	325	276
c53413_g1_i1	103	145	85	98	151	94	67	62
c52033_g1_i2	1011	1541	1304	1590	1160	1166	818	856
c32945_g1_i1	859	1326	970	1170	1478	1064	488	500
c17594_g1_i1	6336	9697	1453	1801	2079	1458	924	881
c47012_g1_i1	1848	3018	3020	3767	2684	2077	1590	1502
c54612_g3_i1	220	269	124	148	135	120	66	72
c52506_g3_i5	1320	1973	934	1059	1476	1135	578	670
c46017_g1_i4	6	14	21	23	132	176	17	15
c51024_g1_i2	1163	1631	1522	1603	3506	3057	1798	1658
c56009_g1_i2	377	598	769	986	421	404	339	354
c50286_g1_i6	2716	4671	4439	5246	5374	3390	2700	2660
c54532_g1_i1	151	229	236	245	199	169	115	127
c55207_g2_i2	255	423	241	279	232	259	172	161
c45371_g1_i3	147	265	214	243	34	41	128	127
c53240_g1_i1	2168	3434	3089	3704	3316	2834	2132	2429
c43974_g1_i3	361	527	515	711	598	532	293	285
c56709_g1_i2	624	1068	452	531	483	466	218	193
c52054_g1_i1	1255	1879	2023	2288	2128	1676	1092	1016
c40060_g1_i2	163	265	347	349	2	1	92	127
c47515_g1_i1	141	172	138	196	111	122	127	81
c52904_g4_i1	122	209	167	236	100	107	67	66
c56383_g1_i2	125	170	133	172	99	112	51	79
c11740_g1_i1	1430	2115	2098	2591	2521	1841	1029	967
c40885_g1_i1	289	545	495	528	993	600	346	428
c40215_g1_i1	63	102	126	137	104	92	64	77
c53589_g1_i1	2669	4214	3325	3659	4055	3588	2681	2464
c49855_g1_i1	76	146	102	136	80	58	43	63
c54167_g2_i1	101	192	108	96	193	184	88	67
c52743_g2_i3	422	803	371	439	411	387	264	293
c56676_g1_i1	2885	5153	5486	6430	5324	5345	5260	5004
c55971_g2_i2	1301	1984	1493	1985	1376	1191	864	735
c29163_g1_i1	695	1086	1064	1260	1234	1018	771	774
c55453_g1_i2	449	745	611	359	805	831	869	686
c53734_g1_i1	144	209	207	209	105	63	60	47
c50408_g4_i2	172	273	154	173	181	187	91	85
c38740_g1_i1	319	603	335	442	573	342	187	245
c49842_g2_i4	288	406	165	228	110	73	123	136
c55632_g1_i1	754	1484	930	1318	503	535	238	362
c44775_g1_i1	700	823	1599	1434	1910	1815	1539	1324
c51077_g2_i1	136	198	132	119	158	119	43	59
c56554_g1_i2	994	1554	373	411	1139	1240	1072	904
c21981_g1_i1	539	1068	862	1070	1097	582	468	533
c37282_g1_i1	216	185	322	222	1982	1467	1569	937
c51002_g1_i5	217	295	293	348	498	431	168	235
c51790_g1_i1	232	378	309	411	237	246	227	211
c45664_g1_i3	156	245	173	214	149	131	91	95
c55655_g1_i2	860	1417	1224	1700	852	808	755	555
c27874_g1_i2	238	381	389	479	330	293	179	200
c53113_g1_i1	363	626	695	902	713	594	382	418
c45795_g1_i2	232	480	419	483	482	341	152	190
c39013_g1_i1	144	239	182	219	182	164	105	100
c55419_g1_i5	134	204	157	188	189	147	101	100
c50232_g1_i1	230	350	350	338	343	340	241	219
c50287_g1_i8	159	233	424	544	168	160	134	144
c46547_g1_i1	4721	7723	7152	8517	9919	7423	4872	4389
c54415_g1_i1	831	1292	1332	1546	2194	1996	1195	1114
c49230_g1_i1	678	1069	1050	1112	1612	1241	690	675
c54947_g1_i3	139	251	132	152	118	155	116	125
c54419_g2_i2	119	179	70	103	80	72	57	59
c40303_g1_i1	121	185	236	270	281	151	137	108
c56479_g1_i4	1230	1737	638	450	1474	996	1571	1155
c49960_g2_i1	257	442	121	128	590	378	167	168
c54405_g1_i1	795	1496	759	880	1920	1631	620	673
c27718_g1_i1	182	276	272	324	276	234	141	121
c48897_g1_i6	137	189	248	304	250	192	148	163
c44048_g1_i1	19	22	780	799	714	450	641	651
c49215_g1_i2	986	1563	737	886	1209	1102	481	484
c53936_g1_i18	4	9	7481	9609	19	16	3	0
c55066_g6_i1	142	212	4	10	4	5	0	0
c48084_g1_i3	377	627	392	389	1284	1013	551	662
c54516_g2_i4	209	326	271	369	290	264	166	162
c52581_g3_i1	91	115	129	147	82	105	105	104
c49760_g1_i1	420	609	414	513	654	564	509	466
c55071_g1_i1	362	522	586	628	333	412	315	337
c44735_g1_i1	65	64	164	168	123	100	195	130
c35023_g1_i1	246	370	208	248	248	238	101	109
c48462_g1_i1	683	1089	1945	2293	778	863	1362	1300
c56577_g1_i1	113	261	154	236	135	131	82	86
c50665_g1_i3	1005	1266	1945	1581	1960	1777	1812	1387
c54735_g1_i5	550	763	817	910	624	562	339	347
c53583_g1_i2	2344	3583	3561	3928	3704	3480	2774	2813
c46554_g1_i1	277	434	315	479	357	287	209	226
c39123_g1_i1	1160	1645	2069	2393	2942	1724	1566	1637
c6628_g1_i1	878	1388	1177	1469	1270	1004	728	642
c53831_g1_i7	138	237	204	239	140	157	89	98
c32900_g1_i1	0	0	78	115	169	117	0	0
c39211_g1_i1	299	482	479	592	505	377	254	243
c50739_g3_i8	277	363	265	406	298	267	124	105
c40354_g1_i1	1178	1821	1689	2032	2457	1715	1013	1012
c47996_g2_i1	285	412	469	596	652	480	322	301
c30193_g1_i1	257	325	360	436	674	388	228	229
c48778_g4_i3	73	150	147	157	126	138	82	87
c40874_g1_i1	1084	1549	4	5	7	12	54	37
c13172_g1_i1	349	542	464	606	616	499	225	260
c47027_g1_i1	511	854	350	477	620	483	218	230
c55127_g1_i1	1537	2532	1576	1956	2005	1983	1284	1302
c55573_g2_i7	475	876	442	617	408	380	572	415
c47159_g1_i1	560	750	606	851	600	546	296	324
c51403_g1_i1	433	716	800	1047	846	711	401	414
c43018_g1_i1	118	199	159	207	168	160	86	110
c48114_g1_i2	615	669	802	1036	526	488	289	215
c53505_g1_i2	706	951	897	1186	873	797	551	503
c13535_g1_i1	383	620	759	946	683	619	682	753
c43528_g1_i1	79	146	131	148	84	66	81	74
c50636_g3_i2	518	605	476	660	465	523	440	305
c46297_g1_i1	1958	2436	1296	1259	166	111	911	581
c56278_g2_i1	138	205	323	351	441	392	231	279
c44120_g1_i1	444	757	630	712	962	715	359	401
c33238_g1_i1	1994	2966	3066	3634	2760	2495	2267	1860
c56184_g2_i2	86	173	206	264	146	133	27	39
c40019_g1_i1	101	186	1	2	0	0	101	121
c31731_g1_i1	115	116	102	129	108	73	32	23
c49748_g4_i2	551	838	872	1024	805	627	506	517
c50789_g2_i1	176	352	196	274	305	250	132	154
c42136_g1_i1	1959	3018	4473	4927	6720	5151	4370	3638
c23347_g1_i1	100	183	155	192	256	148	60	87
c48917_g1_i1	1042	1647	1708	2178	1550	1480	884	927
c40027_g1_i1	116	157	133	158	6	4	18	13
c2708_g1_i1	87	231	0	8	3	2	20	18
c45289_g1_i2	150	152	265	339	162	180	101	66
c49547_g5_i1	195	285	230	276	309	297	139	150
c51324_g1_i3	168	253	204	271	200	165	104	92
c22041_g1_i2	377	595	640	781	713	492	287	320
c55513_g2_i1	138	260	281	327	244	203	204	176
c43288_g1_i4	1	0	192	241	592	584	0	0
c11706_g1_i1	1170	1739	2477	2326	2845	2261	1828	1474
c56043_g1_i1	600	986	1044	1376	824	796	474	474
c56159_g1_i1	604	960	651	841	515	459	387	372
c43847_g1_i1	9	10	224	254	4	7	8	2
c938_g1_i1	2838	4579	4291	5378	4407	3608	1842	1853
c43341_g1_i2	76	142	99	134	115	103	76	51
c54177_g1_i2	1130	1717	1668	2060	2037	1817	1849	1478
c53323_g4_i1	130	182	61	89	136	84	15	14
c52157_g2_i1	112	115	98	144	85	89	70	58
c12928_g1_i1	231	300	324	433	207	168	133	108
c51217_g2_i1	2273	3467	3146	3674	4225	3710	2307	2099
c52845_g1_i3	722	1159	803	964	1246	836	412	425
c55177_g2_i9	62	100	163	207	112	124	31	42
c45599_g1_i1	300	482	441	598	340	247	225	208
c44592_g3_i1	146	193	176	187	200	191	130	95
c46080_g1_i1	997	1674	1893	2275	2378	2178	1393	1240
c47631_g2_i6	326	539	583	708	698	590	302	314
c56522_g1_i4	611	977	978	1389	987	928	640	613
c54204_g1_i7	158	249	112	162	102	108	85	69
c43420_g2_i3	138	201	94	107	116	91	60	54
c39866_g1_i2	772	1238	1556	2032	1411	1214	667	668
c51136_g1_i4	971	1354	1836	1732	798	740	1026	971
c53998_g1_i2	634	987	1096	1094	1308	1214	806	620
c45961_g2_i2	71	138	110	101	128	150	125	122
c56710_g1_i1	1723	2350	4182	4439	2247	2078	2337	1863
c32941_g1_i1	362	480	448	480	418	335	269	255
c44642_g1_i1	121	198	219	232	278	233	100	100
c56155_g1_i6	1166	1787	1571	1951	1954	1697	938	884
c41830_g1_i1	3242	4485	2805	3008	5577	4278	2171	2248
c50898_g3_i1	22	75	122	170	43	54	51	68
c33202_g1_i1	2432	5163	3067	4033	4489	3376	1751	1727
c51273_g1_i12	234	258	286	317	409	361	226	234
c48675_g1_i1	340	425	465	569	145	139	210	306
c45577_g1_i6	388	641	636	707	970	844	410	453
c42429_g1_i1	79	88	118	140	100	90	51	49
c38960_g1_i2	65	105	108	116	172	132	77	59
c56464_g1_i1	381	676	740	1051	751	740	444	458
c40443_g1_i1	189	315	326	401	314	248	125	143
c27574_g1_i1	89	166	44	49	104	68	29	37
c54612_g4_i2	40	56	137	146	71	72	89	67
c39304_g1_i1	292	402	408	613	261	222	246	213
c55158_g1_i3	1943	2980	1774	2009	1251	1251	1145	1176
c53051_g1_i1	145	235	199	294	125	120	81	90
c56613_g1_i1	1051	1300	1578	2024	856	973	904	611
c39047_g1_i1	378	525	574	682	504	405	284	247
c48699_g1_i1	544	801	613	763	720	524	276	285
c47925_g2_i1	105	182	47	46	130	105	79	95
c38417_g1_i1	8591	12632	11011	13232	8163	6903	5535	4674
c56748_g1_i1	210	330	258	267	123	97	233	209
c33495_g1_i2	223	273	281	325	222	189	125	97
c52684_g1_i5	108	167	38	60	11	10	5	20
c46860_g1_i1	308	527	330	380	362	286	206	200
c54439_g1_i5	893	1250	2590	2523	3111	2397	959	902
c50564_g1_i4	151	196	113	156	129	112	96	118
c40971_g1_i1	152	257	128	182	65	42	40	37
c53149_g3_i2	1784	2953	2789	2920	4531	4178	2676	2344
c51407_g1_i1	463	793	591	825	685	629	475	463
c54038_g1_i3	570	936	581	795	264	231	258	281
c53888_g1_i4	88	124	58	91	80	67	53	34
c41531_g4_i1	168	209	194	284	272	214	100	141
c49767_g3_i1	1011	1597	1347	1657	1358	1024	817	873
c45865_g1_i5	161	221	149	209	156	153	51	74
c45188_g1_i10	1984	2800	2498	3056	2504	2364	1684	1622
c51526_g1_i1	903	1364	1839	1990	2620	2385	1086	994
c54369_g2_i1	459	577	114	154	640	579	493	428
c54878_g1_i7	95	123	76	83	178	149	29	31
c53018_g2_i3	109	155	270	300	183	165	241	181
c44144_g1_i2	215	338	232	296	189	172	122	143
c45525_g2_i1	94	154	107	162	102	86	45	48
c54262_g1_i1	121	172	8	22	137	115	6	4
c54567_g1_i1	183	276	123	141	322	284	140	204
c41671_g1_i1	287	509	1067	1328	1046	906	360	326
c55873_g1_i2	231	448	293	373	420	497	146	156
c49352_g1_i1	48	71	114	175	80	99	24	14
c27826_g1_i2	584	954	813	964	891	807	462	429
c50617_g5_i2	224	316	211	284	44	40	30	32
c51770_g1_i1	553	807	658	680	1594	1265	816	766
c49938_g4_i2	130	218	153	185	117	94	96	103
c49125_g2_i3	52	67	272	223	212	195	115	99
c42159_g2_i1	98	124	148	203	39	20	37	54
c43256_g1_i1	4037	7069	1906	2392	3839	3842	1163	1663
c49703_g1_i1	100	139	101	152	54	51	61	48
c1716_g1_i1	318	467	373	503	593	415	250	259
c52572_g1_i7	407	612	440	570	676	531	289	313
c46622_g1_i1	901	1479	2853	4030	3465	3371	1436	1232
c43658_g2_i5	416	610	421	604	338	397	243	220
c35980_g1_i2	125	177	223	197	2	1	57	90
c56110_g1_i1	378	589	771	1002	417	451	316	342
c46324_g1_i2	962	1295	2244	2030	688	577	448	440
c42971_g1_i1	955	1386	1274	1551	1452	1123	633	603
c50401_g1_i2	216	317	432	461	330	319	223	218
c45184_g1_i1	155	273	318	446	333	300	164	177
c29485_g1_i1	179	347	332	356	2374	1409	485	647
c38879_g1_i1	0	1	1188	1595	366	388	8	1
c50800_g1_i1	798	1333	1142	1316	1309	1316	851	808
c53955_g3_i1	269	438	465	580	421	346	236	224
c46049_g1_i2	393	565	652	865	414	357	278	232
c54710_g3_i3	1344	2151	977	1274	984	903	222	188
c50880_g1_i1	532	940	622	736	887	830	460	517
c51298_g1_i2	407	638	479	567	589	426	220	259
c56039_g3_i1	167	284	0	0	0	1	0	0
c51234_g1_i5	906	1381	1458	1463	3188	2736	1379	1259
c51180_g1_i3	21	40	104	142	121	114	21	30
c46334_g1_i1	405	583	579	637	513	430	282	287
c41264_g1_i1	309	544	410	524	465	396	191	223
c45114_g1_i1	5170	7046	9835	9233	16224	12151	6082	6086
c48094_g1_i1	176	271	251	335	252	224	145	153
c52586_g1_i3	2935	4269	5318	6469	4636	4498	2954	2508
c51556_g1_i2	422	712	281	364	495	408	159	180
c55562_g2_i1	629	955	874	1215	799	796	583	526
c51569_g2_i1	82	128	127	160	94	91	76	74
c46011_g1_i5	212	283	289	302	252	155	168	118
c38440_g1_i1	0	0	399	600	0	1	76	115
c40038_g1_i1	104	158	142	165	114	63	34	47
c54412_g2_i1	8	12	191	140	114	82	132	79
c48722_g1_i4	355	483	451	444	1048	934	826	647
c48305_g1_i2	552	636	527	447	961	849	457	367
c49561_g1_i1	66	112	66	94	133	147	11	16
c35507_g1_i1	14492	15128	36406	30225	53505	43973	42339	19385
c54575_g2_i3	727	1159	1255	1561	1079	958	639	480
c41587_g1_i1	593	890	749	929	1066	780	445	489
c49778_g1_i2	145	222	422	549	564	429	164	184
c48588_g2_i1	62	65	118	158	44	60	65	45
c65587_g1_i1	1772	2935	2284	2775	3032	2260	1384	1541
c8090_g1_i1	566	897	2	3	388	212	63	82
c46347_g1_i3	240	352	265	346	280	268	202	204
c52788_g1_i2	181	308	312	405	270	257	159	160
c41509_g1_i2	109	148	92	100	66	58	191	185
c35830_g1_i1	338	518	953	1118	1297	830	507	727
c49455_g1_i1	868	1295	1551	1932	1374	1155	794	676
c12645_g1_i1	171	248	243	272	283	258	137	112
c56166_g1_i1	456	900	862	1257	583	626	531	903
c53442_g1_i3	1246	1864	1867	1982	3362	3014	1851	1909
c45458_g1_i2	132	231	228	317	259	203	114	139
c52318_g1_i1	623	922	806	1014	904	772	436	452
c49182_g5_i1	82	143	54	68	95	71	43	55
c43820_g1_i1	253	402	436	476	443	387	240	261
c56382_g1_i1	2813	4380	4187	4960	4570	4019	2839	2665
c37280_g1_i1	140	185	175	209	206	164	100	84
c38794_g2_i1	1125	1289	635	701	477	204	400	418
c52335_g1_i3	83	113	165	210	135	119	63	79
c52367_g2_i1	16	26	286	301	463	429	117	102
c49794_g3_i1	84	134	137	150	97	103	86	85
c46898_g2_i3	709	1181	1008	1166	897	818	523	602
c39662_g1_i1	295	550	394	511	215	184	147	173
c56373_g1_i3	1842	2678	2433	2666	4197	3734	2415	2029
c39514_g1_i1	188	318	323	395	419	267	142	131
c48254_g1_i1	542	751	415	475	732	634	267	244
c54640_g1_i1	1012	1507	1211	1276	1507	1344	766	728
c45586_g1_i2	371	653	578	782	550	478	217	251
c54684_g2_i1	1112	1605	1462	1980	1429	1070	638	695
c53259_g3_i3	63	89	181	309	74	75	65	67
c56720_g3_i2	496	675	947	840	981	782	791	641
c46715_g1_i1	115	212	172	211	96	99	82	89
c48753_g1_i1	132	229	183	250	227	186	136	133
c54756_g1_i1	267	413	260	326	298	301	179	170
c53824_g1_i5	361	526	340	428	378	327	193	238
c50741_g1_i1	6885	8598	6004	7057	9933	8098	3927	4075
c38365_g1_i1	196	264	301	319	172	128	111	101
c55828_g1_i1	198	335	235	293	105	98	62	85
c55303_g1_i1	315	521	522	681	373	438	283	241
c55353_g1_i2	132	206	169	193	119	93	94	73
c52728_g1_i1	163	176	228	238	239	178	155	92
c41871_g1_i1	229	348	321	379	839	738	473	380
c54282_g2_i3	797	1229	1125	1348	1094	1030	573	573
c54992_g1_i7	442	694	187	237	488	534	197	220
c54446_g1_i9	89	132	351	416	134	179	148	136
c46699_g1_i2	182	274	307	418	318	237	150	182
c46183_g1_i1	50	103	39	55	297	281	81	67
c45944_g4_i3	58	87	0	3	165	222	0	0
c36644_g1_i1	405	567	390	550	460	363	247	218
c16876_g1_i1	486	738	517	770	1543	993	668	651
c39632_g1_i1	179	303	319	365	396	302	182	167
c33162_g1_i4	338	458	507	584	405	430	292	207
c52060_g1_i3	163	203	154	218	141	128	77	101
c47172_g1_i1	1186	1437	1172	1132	2529	2093	1964	1383
c49665_g1_i2	708	1012	817	1046	866	666	426	400
c46963_g1_i3	523	820	615	773	657	628	332	304
c52220_g1_i7	458	646	616	747	585	559	341	324
c52371_g1_i1	603	857	822	1130	497	461	905	920
c36649_g1_i1	349	549	647	741	910	595	333	406
c51217_g1_i2	3081	4670	2609	3106	3824	3421	1839	1940
c49061_g1_i3	189	301	174	352	146	147	82	83
c50234_g1_i1	331	504	363	450	840	706	479	348
c46181_g2_i1	111	154	142	176	97	82	63	70
c40331_g1_i1	116	244	142	196	146	114	68	74
c56661_g1_i2	516	780	1182	1305	289	263	313	332
c50987_g1_i2	1609	2883	2076	2833	476	462	299	454
c27681_g1_i1	7046	11795	12021	14696	11668	9471	5480	4773
c48391_g1_i1	1030	1615	577	713	712	682	331	377
c54575_g4_i1	166	296	72	106	142	178	51	43
c56169_g2_i4	445	681	614	788	564	591	386	346
c49508_g3_i1	100	110	82	77	92	87	70	78
c30043_g1_i3	1201	1935	1813	2274	1785	1485	976	929
c52958_g2_i1	119	173	175	207	150	139	109	89
c46513_g1_i3	587	847	681	921	650	602	401	356
c28169_g1_i2	205	331	224	290	0	2	0	0
c47290_g1_i1	62	132	545	567	561	508	181	142
c50968_g1_i2	169	196	605	625	554	357	321	250
c51965_g2_i2	167	230	75	99	191	194	49	60
c56275_g1_i4	285	523	739	935	566	522	403	345
c49430_g4_i1	120	201	151	180	163	143	76	66
c44880_g1_i2	347	479	330	383	765	698	352	418
c39320_g1_i2	280	384	302	352	247	224	311	306
c53248_g1_i1	645	851	929	916	894	750	657	584
c39001_g1_i1	351	608	439	507	438	378	208	214
c19586_g1_i1	4243	6499	624	847	344	232	2323	2305
c45022_g1_i2	322	419	461	744	271	264	216	140
c50184_g2_i5	21	28	300	306	221	175	21	24
c51143_g1_i1	790	1202	1226	1382	1176	1039	650	663
c48731_g1_i1	1307	1828	2221	2496	2367	2073	1288	1091
c39596_g1_i1	1068	1721	1408	1869	1839	1255	702	682
c42377_g1_i1	328	510	482	641	490	431	284	299
c42894_g1_i1	810	1177	1853	1672	2454	2289	1682	1528
c44233_g1_i2	293	377	161	123	130	169	126	78
c50696_g8_i1	0	0	0	0	230	264	0	0
c38551_g1_i1	110	184	180	228	189	159	102	96
c55008_g1_i1	251	363	481	599	273	268	226	236
c35628_g1_i1	453	704	483	624	352	384	225	231
c50902_g1_i1	814	1310	1096	1266	975	904	672	646
c52936_g2_i1	3	13	28	26	241	178	12	22
c17690_g1_i1	84	161	198	226	190	159	67	97
c35539_g1_i2	0	0	121	153	27	26	7	1
c55766_g2_i3	108	185	149	198	211	195	84	63
c51061_g1_i4	223	320	202	242	177	158	135	135
c55131_g3_i2	389	647	278	363	584	414	228	237
c53140_g1_i6	242	358	377	441	332	250	180	200
c51145_g1_i2	33	65	51	94	329	323	46	85
c41492_g1_i1	6531	10717	10493	12731	12093	8623	5440	5378
c52925_g1_i1	719	1143	1208	1257	1618	1419	1231	1080
c47559_g1_i4	239	399	345	384	75	61	106	139
c68270_g1_i1	90	126	76	102	40	30	26	28
c44983_g1_i2	1211	1880	1669	1757	1746	1562	734	681
c49476_g1_i1	261	389	345	453	316	223	107	127
c56302_g2_i5	436	642	316	431	334	313	220	225
c54864_g1_i2	3730	5378	5479	6340	3986	3240	2123	1873
c52725_g1_i1	1266	1943	2096	2303	2536	2237	1336	1398
c48200_g1_i1	348	514	326	399	398	361	236	241
c55638_g1_i11	826	1176	965	1292	875	809	471	452
c54573_g1_i2	189	267	229	295	209	166	142	130
c47633_g1_i1	571	833	906	1041	1039	898	714	636
c45033_g1_i1	404	585	445	560	530	338	249	239
c43346_g1_i1	2511	4267	1303	1747	2415	1649	1	5
c41290_g1_i1	640	989	1548	1983	1021	651	649	613
c50414_g1_i1	164	284	207	303	733	606	210	176
c47809_g1_i1	80	130	18	36	13	17	7	13
c48425_g1_i4	73	113	131	137	61	39	52	64
c48573_g1_i1	82	120	69	121	62	41	8	7
c50750_g2_i2	116	210	242	278	81	67	56	63
c46330_g1_i2	269	472	318	355	393	334	195	196
c51676_g1_i1	131	182	230	311	177	166	110	85
c56681_g1_i3	171	342	252	242	421	374	127	128
c37064_g1_i1	152	257	208	274	252	156	105	133
c43631_g1_i1	305	550	547	650	458	419	333	344
c55897_g1_i2	44	69	117	132	54	82	52	68
c56574_g1_i1	246	352	148	116	192	200	688	612
c51577_g1_i4	76	97	85	149	140	72	38	40
c39371_g1_i1	3306	5627	4500	5515	5929	3491	2049	2301
c51194_g1_i2	3225	5034	4916	5750	5503	5158	3823	3321
c44868_g1_i1	61	92	89	122	97	78	86	88
c52481_g1_i2	86	168	147	133	121	111	48	70
c51898_g5_i6	487	781	699	835	596	578	386	369
c47755_g1_i5	86	125	107	126	106	109	52	60
c40248_g1_i1	2028	2958	2882	3071	3793	3546	2022	1708
c53798_g3_i1	182	291	225	306	132	162	188	151
c53763_g1_i3	371	565	511	690	556	511	281	287
c54689_g3_i1	98	129	98	133	138	156	59	67
c44720_g2_i1	159	290	424	461	330	247	164	192
c28149_g1_i1	1683	2741	2460	2795	2810	1866	1025	1063
c53543_g1_i4	4314	6704	4601	5841	8359	6573	3431	3735
c53062_g1_i2	334	501	377	414	451	445	260	295
c48400_g1_i1	60	91	80	118	148	109	64	66
c29909_g2_i1	293	436	507	664	473	357	218	237
c25085_g1_i1	1824	3046	2266	2503	4422	3049	1522	1777
c65318_g1_i1	1872	2829	2956	3068	5471	5006	4170	3783
c54419_g1_i2	320	456	394	491	372	343	167	177
c30130_g1_i1	12	20	95	200	88	124	20	13
c55120_g1_i6	1106	1427	1541	1560	2374	2030	1377	1193
c48030_g2_i1	752	1227	1210	1712	1019	832	526	560
c40680_g1_i1	275	398	323	432	395	294	210	177
c53208_g1_i2	43	81	135	167	46	47	19	26
c48668_g1_i1	182	243	187	195	404	362	227	190
c38580_g1_i1	7834	12448	3452	2303	8418	6562	4189	2562
c49660_g2_i9	158	217	278	374	2	0	62	53
c43601_g1_i1	106	132	176	246	165	86	62	75
c60145_g1_i1	119	177	170	230	254	148	89	112
c54001_g1_i13	265	376	161	163	303	277	198	239
c53952_g1_i11	768	1260	1219	1481	999	966	710	665
c56256_g1_i9	246	356	268	344	214	163	108	120
c46933_g1_i2	383	648	738	900	717	580	363	346
c53934_g2_i1	277	415	393	485	447	370	170	158
c51564_g1_i1	654	976	1251	1328	1510	1473	1014	1004
c56461_g1_i1	570	1029	643	759	647	500	339	361
c52646_g2_i1	70	101	40	66	111	99	113	70
c52147_g2_i1	170	285	225	308	338	245	126	149
c54504_g4_i1	70	49	126	57	145	100	468	151
c52778_g1_i1	2014	3617	3579	4299	3717	3395	2066	1971
c55845_g2_i1	104	140	111	72	198	195	231	195
c31273_g1_i1	307	487	411	458	384	315	183	184
c56655_g1_i3	629	907	817	1079	940	1313	506	485
c55348_g1_i3	127	156	169	217	73	74	11	11
c46906_g1_i3	276	331	317	341	233	225	164	107
c40220_g1_i2	253	403	411	529	369	270	190	192
c41882_g1_i1	282	439	374	510	391	323	209	203
c50359_g1_i1	204	301	269	327	333	223	228	205
c56262_g1_i2	348	539	518	634	444	455	390	341
c55667_g1_i1	1536	2165	1990	2489	2207	2128	1661	1472
c46700_g2_i2	229	362	380	441	494	411	325	243
c53445_g1_i1	1607	2383	4978	4997	5148	5138	4150	3834
c55359_g1_i2	362	503	440	555	543	695	546	460
c48988_g1_i1	39	80	139	142	98	94	58	58
c53314_g1_i2	152	183	110	173	92	81	83	89
c52783_g3_i2	1	0	1847	2248	5	4	0	0
c40790_g1_i1	272	443	296	407	350	274	200	204
c55580_g2_i1	146	197	28	30	31	25	10	14
c22295_g1_i1	210	357	355	389	548	356	182	207
c53111_g3_i1	173	198	116	143	90	87	94	102
c44387_g1_i3	51	81	175	177	55	45	43	68
c10518_g1_i1	159	215	150	166	328	147	80	103
c55451_g3_i1	611	738	1053	1487	306	267	216	179
c63021_g1_i1	179	293	263	322	402	204	116	137
c46478_g1_i1	549	839	608	659	697	595	369	339
c50801_g1_i1	105	165	129	185	158	119	95	81
c50385_g1_i1	270	311	328	406	219	190	160	112
c54780_g1_i1	107	189	42	47	1	0	0	0
c43163_g1_i1	180	193	9	6	64	56	1	3
c63249_g1_i1	0	0	0	2	309	283	0	0
c37568_g1_i2	407	594	603	566	641	565	350	348
c46662_g1_i1	448	598	381	460	455	323	182	196
c41493_g1_i2	71	120	122	141	176	115	58	67
c49711_g2_i1	341	488	518	554	465	392	271	258
c48497_g2_i1	299	551	423	501	380	376	317	242
c54047_g2_i3	72	99	60	79	49	55	90	87
c50099_g4_i1	51	80	81	131	96	85	55	71
c53622_g2_i1	121	228	144	183	150	165	130	96
c18324_g1_i1	126	226	173	274	49	49	67	58
c52325_g1_i1	55	49	67	69	174	163	97	79
c46067_g1_i1	103	162	145	173	126	126	65	77
c42266_g1_i3	120	175	301	313	100	54	24	29
c46641_g1_i1	763	1174	985	1162	1296	1184	657	601
c56381_g2_i1	2866	5302	6536	6126	549	396	333	563
c43078_g1_i1	41	86	101	129	37	71	84	56
c34542_g1_i1	132	234	78	104	223	118	38	60
c53256_g1_i3	158	247	264	295	177	145	95	109
c51488_g2_i1	129	157	83	112	78	66	49	41
c50268_g1_i1	82	130	129	152	83	87	53	60
c41692_g1_i1	315	493	324	357	641	541	330	293
c53275_g1_i2	198	289	197	256	193	207	111	84
c51416_g1_i3	42	83	13	30	48	70	110	105
c45092_g1_i1	77	116	83	128	27	43	42	40
c44429_g1_i2	811	991	935	1007	1106	1068	869	609
c37195_g1_i1	119	168	162	163	302	315	456	202
c51205_g1_i1	80	40	26	15	121	78	91	36
c53526_g5_i2	59	81	986	1166	12	6	140	110
c33545_g1_i1	285	425	482	575	449	332	176	200
c52917_g1_i3	79	100	118	163	77	92	60	42
c36082_g1_i3	376	747	552	768	675	464	290	324
c54390_g1_i3	198	377	387	417	725	672	270	317
c50872_g2_i2	341	521	539	640	515	389	211	243
c44828_g1_i1	159	227	331	400	312	315	247	212
c52095_g1_i1	493	775	786	927	654	638	344	363
c51510_g5_i4	2327	3650	1480	1968	1907	1857	1607	1611
c52928_g1_i1	119	192	131	172	169	131	83	70
c45875_g2_i1	0	0	140	180	75	66	64	81
c50438_g1_i3	184	316	223	217	209	221	222	219
c53252_g1_i5	493	779	841	866	767	599	392	405
c43583_g1_i1	51	89	89	148	134	165	60	45
c53158_g2_i2	344	561	410	506	722	628	339	413
c46614_g2_i1	1193	1713	815	1020	876	719	455	532
c47653_g1_i2	682	1403	1403	1714	2560	2293	1110	1241
c48631_g1_i4	365	540	791	955	1835	1853	1744	1237
c54047_g5_i1	191	411	79	91	62	56	71	89
c45116_g4_i1	150	176	51	63	76	49	32	32
c49431_g1_i1	1277	1730	1345	1591	679	699	543	448
c49161_g1_i2	254	430	260	311	214	214	145	143
c27389_g1_i1	114	161	129	173	111	103	69	73
c54328_g2_i7	478	842	676	700	601	491	366	425
c45139_g1_i1	95	171	143	211	34	22	42	52
c54355_g1_i2	79	111	111	137	80	63	66	55
c36977_g2_i1	91	147	122	158	116	127	97	56
c52558_g1_i1	826	1273	1829	2165	1505	1398	1089	952
c45513_g1_i2	113	148	76	113	23	23	81	91
c51015_g1_i4	287	450	481	562	431	385	256	234
c52182_g1_i1	646	931	48	57	727	460	229	185
c33582_g1_i1	228	330	313	359	385	278	223	187
c54243_g1_i2	131	177	156	185	250	135	69	71
c51683_g1_i2	207	335	366	440	468	408	197	180
c38156_g1_i1	86	203	212	295	164	107	78	90
c51442_g1_i3	99	131	70	93	188	166	83	70
c54657_g1_i5	597	824	918	1205	826	762	342	313
c29635_g1_i1	134	242	248	351	263	225	180	125
c55775_g1_i3	659	1099	986	1203	1080	1066	540	574
c5871_g1_i1	16418	25061	27432	31542	32692	20565	13955	14374
c46451_g1_i3	1239	1840	1553	1814	1972	1713	1030	954
c54300_g2_i1	115	181	151	165	125	149	104	94
c47191_g1_i1	465	702	128	175	805	555	228	208
c43187_g1_i1	82	166	32	49	139	135	0	1
c43090_g2_i1	28	79	139	153	44	47	98	93
c56193_g1_i1	225	382	284	288	417	330	159	174
c53370_g3_i5	1017	1582	2118	2550	1521	1288	974	873
c35376_g1_i1	228	365	367	373	554	450	227	223
c42048_g2_i1	2089	2817	2505	2760	4324	3451	1791	1903
c53324_g2_i2	108	137	76	89	102	111	50	44
c48727_g2_i1	482	792	836	728	1709	1444	743	703
c52281_g1_i3	88	160	5	5	170	154	0	0
c65694_g1_i1	93	138	212	280	220	143	84	100
c40586_g1_i3	536	668	825	748	1030	865	470	390
c36830_g1_i1	2426	3616	2904	3640	2334	1807	1425	1344
c47589_g1_i7	1968	3540	2128	2620	769	736	554	773
c44280_g1_i1	69	92	145	182	152	108	64	44
c55984_g1_i1	780	1308	1207	1525	1043	985	704	644
c48389_g1_i2	108	118	23	50	37	24	26	26
c48915_g1_i2	512	804	695	835	738	672	441	454
c51742_g3_i2	63	119	71	102	67	73	54	71
c45721_g1_i4	134	204	120	161	145	109	59	73
c53683_g1_i1	3151	3912	8104	7010	9254	7882	6888	6825
c40994_g1_i1	6370	7482	4341	2965	6183	4769	7965	6344
c22234_g1_i1	932	1308	1254	1795	826	693	447	411
c37296_g1_i1	116	128	136	176	95	98	82	59
c41225_g1_i1	165	247	268	335	392	318	157	173
c50560_g2_i1	2154	3354	3568	4085	5053	3490	2285	2234
c56098_g1_i3	135	217	352	401	180	188	131	133
c42121_g1_i1	72	83	128	149	53	69	42	33
c47525_g1_i1	431	714	781	1093	740	611	345	423
c55846_g1_i17	198	239	333	257	578	555	244	168
c48067_g1_i1	281	478	537	624	478	406	214	281
c24340_g1_i1	419	709	680	760	745	558	383	359
c43566_g1_i1	315	515	541	667	548	473	282	263
c44483_g1_i1	38	68	252	327	225	223	102	107
c34467_g1_i1	578	766	174	212	4	0	0	0
c52255_g2_i1	557	750	731	964	655	593	526	407
c55248_g1_i2	28	70	237	312	1007	1043	232	249
c52577_g1_i1	1181	1631	1479	1793	1599	1477	906	826
c54740_g1_i4	129	182	132	191	147	120	105	121
c46954_g1_i3	110	207	116	132	128	96	82	80
c54867_g3_i1	144	214	230	231	239	236	138	169
c46227_g1_i1	101	174	163	208	142	117	79	74
c37708_g1_i1	1012	1631	1685	1906	2494	1914	1123	1096
c53451_g1_i5	544	912	1156	1563	1024	1010	734	797
c50971_g1_i2	105	167	192	224	150	131	68	64
c51225_g1_i2	513	864	511	660	600	517	310	303
c45182_g1_i1	392	681	583	811	656	505	374	388
c48634_g1_i2	984	1320	1134	1362	1886	1650	960	1037
c37444_g1_i2	0	1	437	564	11	21	166	247
c56441_g1_i2	625	946	568	656	805	731	523	460
c54153_g1_i3	88	165	148	216	257	206	89	84
c37737_g1_i1	252	317	3	16	465	314	200	212
c39552_g1_i3	104	148	154	202	127	110	53	67
c47461_g2_i1	233	357	322	406	292	263	161	156
c52620_g2_i2	184	335	152	238	257	254	136	198
c46727_g1_i3	2347	3305	4051	4854	26	24	40	39
c54531_g1_i2	188	267	177	260	127	134	46	49
c47044_g1_i2	0	0	4	2	174	179	10	0
c41642_g1_i2	86	140	116	154	181	90	57	77
c41850_g1_i1	115	181	458	499	85	52	311	373
c52246_g1_i1	121	236	212	286	236	157	96	117
c46795_g1_i2	325	548	544	697	693	706	308	308
c49283_g1_i1	215	272	277	323	152	173	152	113
c54734_g1_i6	96	146	83	57	0	0	77	73
c53891_g1_i1	99	212	153	158	69	74	148	103
c56639_g1_i2	1290	2230	2556	3208	2014	2168	1933	1722
c54241_g1_i3	463	657	404	362	1279	1045	454	449
c20327_g1_i1	965	1575	950	1347	1441	1118	741	755
c56126_g4_i1	20	55	184	107	1467	1149	82	107
c43776_g1_i4	2055	3197	2900	2967	2461	2131	2204	1442
c55160_g2_i1	1374	2194	1650	1917	2834	2968	1534	1402
c54655_g3_i1	107	174	170	224	167	151	71	80
c53276_g1_i21	119	150	74	94	76	65	46	46
c31702_g1_i1	107	165	236	278	272	162	101	109
c47731_g2_i1	1282	1713	556	827	748	560	1443	1384
c50617_g3_i1	200	366	65	81	106	101	38	34
c48671_g1_i1	1111	1860	1441	1734	2041	1431	1110	1089
c52208_g2_i1	158	210	168	236	118	101	109	85
c52775_g1_i1	10	24	374	402	439	293	7	6
c47131_g1_i4	1606	2605	2087	2688	2107	1728	1145	1154
c25821_g1_i3	454	654	512	627	765	516	243	243
c54665_g2_i2	250	372	651	514	1381	1422	482	411
c56066_g1_i1	1511	2528	2466	3332	2637	2747	2215	1922
c55350_g1_i1	300	517	414	555	329	350	188	204
c48809_g2_i1	0	1	0	2	472	527	0	0
c46665_g1_i2	314	445	407	553	421	325	211	192
c6401_g1_i1	354	577	676	791	832	716	497	506
c53081_g1_i1	124	260	176	257	186	153	81	99
c46880_g1_i1	13979	22751	17442	20280	14021	12165	8264	8260
c54801_g3_i2	176	348	131	221	93	91	37	59
c35404_g1_i1	139	216	177	217	289	183	115	91
c43486_g1_i1	747	1258	1235	1456	1734	1554	765	676
c49611_g4_i1	102	169	120	132	187	189	95	92
c47857_g2_i2	465	712	997	1140	912	733	434	446
c56397_g1_i4	159	225	553	421	336	346	478	361
c55015_g2_i2	90	158	27	56	56	71	17	15
c48289_g1_i1	1091	1809	1414	1786	1723	1257	754	697
c54917_g1_i1	266	416	246	285	236	261	186	155
c31296_g1_i2	176	282	0	0	0	0	0	0
c40918_g1_i2	106	142	156	173	185	142	63	59
c45071_g1_i1	95	141	155	140	181	138	93	67
c50632_g1_i1	90	173	141	169	218	212	257	211
c51157_g1_i2	700	1069	826	963	999	875	685	528
c47304_g1_i2	452	639	560	679	526	507	292	272
c50095_g1_i3	403	408	2459	1604	2101	1452	1553	811
c55535_g2_i1	159	205	127	144	99	98	79	78
c50696_g1_i7	147	221	197	219	372	376	148	162
c42914_g1_i1	222	363	232	256	231	140	94	91
c53836_g1_i3	3291	3951	10096	5859	16962	14370	16706	8200
c16249_g1_i1	528	769	854	1023	1086	743	394	419
c53715_g1_i2	125	246	208	209	183	145	110	102
c55577_g1_i1	577	953	966	1128	724	655	596	528
c54029_g2_i3	345	449	163	170	110	75	241	239
c36548_g2_i1	230	389	410	432	523	350	247	245
c52946_g1_i1	1685	2516	1703	1773	2759	2144	1146	1217
c55459_g2_i1	85	51	313	182	586	444	898	392
c44054_g1_i1	342	422	352	432	530	371	1	2
c46944_g3_i6	737	1137	449	511	400	356	590	500
c47831_g1_i4	494	616	505	599	974	590	232	269
c41117_g1_i1	102	124	174	180	133	90	67	72
c48279_g1_i1	145	200	223	299	86	77	109	86
c47803_g1_i2	320	559	454	534	384	369	232	246
c42527_g1_i1	332	493	585	590	638	474	237	264
c20739_g1_i1	103	165	118	167	144	94	59	64
c47743_g1_i3	710	868	672	720	1432	1202	589	526
c39667_g1_i1	61	108	108	146	90	74	70	73
c3633_g1_i1	596	905	570	675	624	462	271	248
c46966_g1_i2	135	224	152	159	204	160	154	96
c55843_g1_i1	9632	14423	10943	13149	11884	11158	9680	9370
c52710_g1_i7	436	661	534	639	335	308	300	312
c52741_g1_i1	1441	2592	702	534	871	1175	3524	2672
c48996_g2_i1	154	202	2	5	56	69	15	13
c43023_g1_i1	6202	9554	1404	1764	2108	1609	946	900
c49285_g1_i3	65	124	146	160	108	99	154	127
c29174_g1_i1	98	145	52	68	91	83	16	5
c49310_g2_i4	128	149	61	59	109	124	7	15
c49066_g1_i5	1145	1901	1823	2200	1898	1718	902	1097
c50449_g1_i1	5868	9353	12794	10741	20240	15486	9891	9805
c54874_g1_i1	1463	2062	2448	2668	2218	2022	1482	1256
c55135_g3_i2	224	341	196	213	291	246	71	81
c53060_g1_i1	21	45	215	343	382	495	89	30
c44671_g1_i3	219	364	368	406	305	265	224	234
c48417_g1_i1	80	98	145	175	96	136	67	53
c70968_g1_i1	1895	3124	2290	2985	3136	2345	1614	1722
c54665_g1_i1	3557	5378	3833	4308	9253	8285	3716	3969
c40691_g1_i1	111	134	139	216	102	122	84	100
c46355_g1_i1	131	203	197	263	250	182	122	136
c54252_g1_i1	2452	3683	3617	4057	3603	3085	2503	2275
c54159_g2_i5	88	143	118	151	76	60	52	79
c53885_g7_i2	906	1527	1457	1765	1237	1191	713	650
c38510_g1_i1	90	100	111	148	114	93	55	36
c48632_g1_i1	395	520	463	636	511	482	348	371
c13255_g1_i1	381	559	688	662	972	711	499	364
c43659_g1_i1	191	330	207	236	341	257	166	189
c55919_g1_i2	178	209	152	165	351	398	159	148
c51401_g2_i1	47	99	117	151	83	41	53	44
c14978_g1_i1	418	701	734	911	1013	595	303	361
c51070_g1_i2	2291	3483	3343	4027	3370	2739	1753	1726
c55745_g1_i1	413	626	361	467	290	260	229	203
c52517_g1_i3	219	303	226	300	164	124	144	124
c53427_g1_i1	326	517	394	518	374	390	312	268
c50092_g2_i1	57	90	144	153	99	89	53	53
c70906_g1_i1	2434	3486	4995	4154	11591	9766	4656	4002
c21351_g1_i1	1205	1807	1503	1927	1812	1411	896	883
c28303_g1_i2	105	153	181	203	85	93	83	61
c43622_g1_i1	1097	1675	1726	1861	1726	1456	799	849
c40565_g1_i4	486	623	684	910	2	0	429	366
c41904_g1_i1	1721	2024	1574	2040	1291	1024	697	570
c56657_g1_i3	1733	3082	3609	4346	2763	2817	1862	1604
c55464_g1_i2	102	208	224	311	179	155	130	123
c56548_g1_i2	1613	2217	2148	2955	1398	1556	1774	1191
c29903_g1_i1	129	206	156	225	169	177	104	117
c54344_g1_i4	181	321	196	241	347	312	124	96
c44263_g1_i1	50	134	102	114	145	116	44	47
c40897_g1_i1	263	453	444	533	438	342	219	194
c54118_g1_i1	78	142	179	227	154	180	75	97
c43805_g1_i1	1247	1924	1482	1813	1430	1431	1070	1033
c46945_g1_i2	176	286	359	439	349	254	135	163
c44332_g1_i1	77	146	9	26	112	115	2	2
c48243_g1_i6	325	476	261	341	987	900	203	273
c47151_g1_i2	64	55	215	258	112	114	30	31
c50288_g2_i1	145	265	197	297	213	176	124	124
c42008_g1_i3	71	110	126	132	115	82	75	74
c45962_g1_i1	723	1249	1620	1928	1708	1235	830	779
c51333_g1_i1	196	294	262	317	228	176	80	105
c54146_g1_i1	119	171	145	196	175	119	73	94
c51553_g1_i1	218	413	230	323	200	208	174	146
c56343_g2_i1	829	1412	1202	1569	1262	1177	707	725
c55915_g1_i4	353	493	442	533	448	469	240	228
c48552_g1_i2	78	130	20	19	4	4	8	5
c42318_g1_i2	130	215	188	219	257	210	91	105
c48126_g1_i1	423	631	498	699	586	531	296	307
c35793_g1_i1	117	208	127	138	131	110	66	39
c56063_g1_i2	350	681	619	706	437	507	296	330
c49037_g2_i1	98	184	21	26	1	4	26	24
c37053_g2_i1	2305	3342	1959	2034	1939	1425	930	1032
c36153_g1_i3	367	598	4	6	0	2	0	0
c50273_g1_i1	30	64	143	161	99	106	32	43
c47882_g1_i1	263	388	389	462	398	340	258	255
c44164_g1_i1	2601	3734	3215	3651	3247	2244	1612	1657
c52542_g1_i1	207	430	407	454	296	250	157	147
c44000_g1_i1	754	1192	1228	1294	1525	1339	788	774
c51959_g1_i6	280	461	329	380	438	464	284	274
c30226_g1_i2	98	138	71	82	170	112	86	106
c53411_g2_i5	219	254	272	275	419	366	101	96
c27006_g1_i1	2955	4041	3375	3865	3540	2200	1424	1638
c54940_g1_i1	62	133	541	740	81	102	0	0
c51472_g1_i1	66	87	61	80	278	256	226	232
c55116_g1_i3	73	118	88	130	100	105	36	40
c47739_g1_i1	97	170	167	207	192	142	81	98
c54379_g1_i7	1	0	343	462	65	67	166	111
c43326_g1_i1	75	109	140	174	128	115	40	48
c55584_g1_i1	69	129	127	167	81	95	87	112
c55770_g1_i2	1250	2090	1430	1799	1581	1258	909	810
c21994_g1_i2	129	242	134	202	195	134	48	74
c65329_g1_i1	106	163	236	277	278	237	121	121
c52257_g2_i3	75	101	118	140	157	107	51	56
c56160_g1_i5	326	474	231	334	251	217	310	269
c43135_g1_i2	835	1353	689	775	1502	1525	857	945
c51931_g1_i2	1181	1786	1418	1887	1920	1795	1003	1072
c39034_g1_i1	5335	9118	8489	10583	9167	6465	3456	3184
c54249_g1_i4	449	737	733	868	749	606	387	401
c52671_g1_i2	1015	1257	1282	1270	1604	1259	1157	1061
c17649_g1_i2	89	101	94	127	123	82	67	78
c55018_g2_i1	582	925	1029	1247	772	737	628	503
c50998_g1_i1	877	1310	1771	2018	1591	1387	1294	1184
c65832_g1_i1	206	284	0	0	0	0	1	1
c49168_g2_i2	154	261	94	117	29	27	136	118
c47747_g1_i1	165	278	185	250	211	155	137	126
c49996_g2_i1	62	96	134	153	94	90	49	54
c34810_g1_i1	2799	3756	5307	4838	9250	6576	4897	4101
c33731_g1_i3	976	1668	2117	2448	2043	1878	1048	1161
c56213_g4_i1	315	429	403	455	434	399	474	468
c47505_g1_i1	100	164	173	209	163	120	68	87
c49007_g4_i1	375	570	2	12	3	4	1	0
c55078_g1_i3	764	1205	352	441	1215	1032	612	739
c54314_g5_i1	22	20	191	226	172	130	87	97
c48767_g1_i2	182	258	341	434	237	265	205	199
c37202_g1_i1	354	472	209	293	192	199	65	72
c48209_g3_i1	290	489	484	645	317	313	195	245
c47419_g1_i1	141	338	5	8	208	190	5	2
c53876_g1_i1	316	485	373	544	468	351	198	236
c52588_g2_i1	207	326	238	269	313	274	159	153
c50657_g1_i1	599	1010	1305	1294	1176	1306	2990	2315
c48236_g1_i1	359	569	333	560	4	0	266	265
c41378_g1_i3	172	218	259	380	231	228	132	105
c42682_g1_i1	1589	2306	2163	2317	3613	2923	2135	1874
c46493_g1_i1	473	693	566	668	626	540	396	380
c37892_g1_i1	232	366	2304	3363	95	75	322	363
c52982_g1_i1	339	467	504	584	618	520	266	236
c28065_g1_i1	219	376	362	403	507	402	291	289
c55876_g4_i2	374	584	562	623	738	596	286	282
c47127_g1_i1	346	488	465	563	595	488	428	396
c46489_g1_i1	605	778	776	850	494	427	330	252
c48605_g1_i1	140	246	242	307	298	191	161	111
c54973_g1_i2	313	446	313	446	231	224	216	183
c30220_g1_i2	1353	2320	1783	2179	2080	1624	756	750
c31604_g1_i1	788	1189	942	1175	1067	961	439	444
c49925_g1_i2	89	149	60	63	89	96	49	68
c43944_g1_i1	104	174	178	225	117	107	68	87
c56736_g2_i1	627	917	881	1038	924	783	505	537
c50037_g2_i4	1159	1900	2110	2352	2525	1747	1012	1098
c46359_g1_i2	275	424	510	534	651	579	361	351
c34527_g1_i1	76	158	147	158	65	49	28	27
c52219_g1_i1	214	359	383	493	169	126	107	140
c30921_g1_i1	374	655	534	650	448	439	431	457
c36421_g1_i1	681	1101	1361	1446	1784	1671	954	947
c56790_g1_i1	655	1014	851	1072	1112	752	479	552
c48968_g1_i1	329	623	430	622	590	430	256	286
c43719_g1_i2	290	366	329	403	347	206	78	72
c47212_g1_i4	1632	2803	2591	3127	2240	2184	1355	1292
c45302_g1_i1	256	437	449	549	579	390	165	200
c42258_g1_i1	480	770	612	704	872	801	324	376
c54559_g1_i2	472	554	558	680	149	129	350	345
c53967_g1_i1	262	475	629	788	709	859	1533	1207
c46936_g1_i3	221	242	254	409	153	101	59	35
c40609_g1_i1	564	932	1022	968	998	996	493	393
c47188_g2_i2	507	888	647	759	646	552	326	407
c42326_g1_i1	32	56	218	138	92	89	111	81
c53385_g2_i1	548	900	652	835	459	417	278	273
c53903_g4_i2	1447	2192	2745	2650	5875	4816	2604	2389
c55124_g1_i4	849	1129	565	777	489	497	515	356
c53042_g1_i2	312	499	283	297	274	181	163	183
c52759_g1_i7	501	910	1135	1466	1030	1008	702	710
c36275_g1_i1	3492	5397	5419	5793	7447	5578	3859	3822
c46093_g4_i1	0	0	2	6	129	120	0	0
c54352_g2_i11	328	567	605	751	478	448	364	375
c47707_g1_i10	298	545	423	571	505	480	275	262
c51132_g2_i6	124	184	90	150	26	23	29	28
c42755_g1_i1	332	571	611	736	536	526	260	249
c56235_g1_i2	146	233	227	373	159	119	100	119
c41285_g1_i1	757	1171	1212	1594	1686	1375	926	812
c51302_g1_i1	720	1102	885	1235	834	694	531	490
c28082_g1_i1	2719	4087	2737	3011	9415	7825	3490	3123
c36256_g1_i1	751	1229	990	1258	1164	819	533	556
c40168_g1_i1	3469	5121	1148	1186	2484	1596	1714	1845
c44902_g1_i2	1723	2243	3315	3311	2908	2808	4170	3406
c46121_g1_i1	106	136	119	128	113	99	52	66
c38754_g1_i2	282	347	2239	2280	1128	794	726	644
c49294_g5_i1	10	16	78	72	44	36	115	122
c54344_g2_i1	243	309	259	354	244	196	259	237
c50589_g4_i2	188	327	3	2	60	48	16	12
c42007_g1_i2	115	217	188	213	206	164	81	98
c52080_g1_i2	604	802	689	810	695	683	544	403
c52420_g1_i1	648	1122	812	1081	1037	978	685	631
c27418_g1_i1	284	368	0	0	2	0	299	214
c50710_g1_i3	94	140	101	134	94	87	93	105
c46728_g1_i4	1	5	135	153	98	69	4	6
c54215_g2_i1	315	478	465	556	1039	934	524	685
c56326_g1_i3	1064	1474	1010	1342	894	839	715	662
c41095_g1_i1	358	656	670	884	549	525	359	350
c8392_g1_i1	694	1095	1083	1272	1438	1172	608	641
c47124_g1_i3	340	589	408	477	548	497	293	296
c53331_g1_i2	114	234	16	14	43	54	10	15
c27651_g1_i1	2005	3195	2319	2587	4781	3208	1651	1938
c51347_g2_i2	90	177	194	290	159	138	46	58
c50628_g5_i1	334	497	569	607	0	0	356	294
c20358_g1_i1	5312	8550	7667	9193	8539	6365	4003	3909
c52935_g3_i4	61	106	128	164	69	88	70	64
c54914_g1_i6	307	456	607	771	545	449	358	376
c55487_g1_i4	196	311	278	346	243	256	126	119
c55860_g1_i3	258	328	547	507	550	624	728	626
c46534_g2_i2	214	357	240	257	113	149	2	2
c46674_g3_i1	1039	1746	1122	1387	2774	2919	628	678
c19699_g1_i1	240	366	281	292	402	231	130	114
c41536_g1_i1	100	150	36	44	58	63	7	5
c54442_g1_i4	337	607	482	603	506	389	306	308
c26555_g1_i1	471	903	350	423	580	528	452	514
c54944_g1_i8	241	380	306	386	214	158	196	178
c44928_g1_i1	111	210	165	252	216	156	69	98
c49779_g2_i1	30	41	45	41	1	2	109	132
c46561_g1_i4	159	241	88	109	139	117	71	82
c41874_g1_i1	1501	2136	1788	2068	2320	1727	1044	998
c42829_g1_i1	296	431	654	738	190	126	156	140
c37113_g1_i1	1218	1874	1267	1654	1366	964	624	581
c49704_g1_i3	118	195	134	187	173	134	60	80
c37192_g1_i1	285	406	551	766	1035	963	713	887
c53312_g2_i1	151	268	402	490	492	298	95	94
c37212_g1_i1	4740	7334	6699	7773	9393	6307	3394	3507
c32564_g1_i1	971	1532	1764	2034	2921	2201	1225	1373
c55944_g1_i4	508	759	696	838	825	769	507	498
c39576_g1_i1	321	538	391	462	540	398	191	215
c25078_g1_i1	88	140	105	121	87	96	58	50
c54112_g1_i14	1488	2423	1424	1815	1812	1719	1058	1143
c38731_g1_i2	3703	5539	4993	5483	5085	4361	2500	2433
c50050_g1_i2	445	663	771	873	825	660	332	342
c52806_g1_i2	231	413	416	407	559	421	228	219
c13278_g1_i1	177	344	334	412	360	375	218	241
c42337_g1_i2	352	594	499	562	561	478	468	385
c47121_g1_i2	475	841	660	878	514	508	321	334
c50728_g2_i2	418	653	438	502	562	572	279	281
c55987_g5_i3	394	637	657	837	513	456	333	328
c54027_g1_i2	161	229	209	267	157	144	109	113
c55326_g1_i6	41	76	189	181	112	150	81	69
c50358_g2_i1	541	771	763	807	1073	918	585	540
c43819_g1_i1	144	209	148	167	188	145	76	87
[truncated: 9,113 more rows]
